# Supplementary material for: Consensus definition of sludge and microlithiasis as a possible cause of pancreatitis
Source: PubMed Central journal article supplement — Gut. 2023 Apr 18;72(10):1919–26. doi: 10.1136/gutjnl-2022-327955 (PMC10511955; doi:10.1136/gutjnl-2022-327955), 2023-04-18
Supplement: gutjnl-2022-327955supp001.pdf [file gutjnl-2022-327955supp001.pdf]

## SUPPLEMENT

### Outline

1. Full search term
2. Literature database
  - 2.1 Research Paper Dataset Summary (Quality Assessment included)
    - 2.1.1 Overview of fulfilled inclusion criteria / study
    - 2.2 Review Paper Dataset Summary (No Quality Assessment)
3. Data collection
4. Quality assessment
5. Assessment of the risk of bias
  - 5.1 Domain 1: Patient selection
  - 5.2 Domain 2: Index text
  - 5.3 Domain 3: Reference standard
  - 5.4 Domain 4: Procedure and schedule
  - 5.5 Quadas 2 Tool
6. Studies excluded in the full text screening phase (with short justification)
7. Expert Survey
8. Pancreatitis patient population stratified by underlying biliary entity
9. Audience Agreement
10. Clinical case vignettes

## 1. Full search term

| History and Search Details |         |         |                                                                                                   |         | Download | Delete |
|----------------------------|---------|---------|---------------------------------------------------------------------------------------------------|---------|----------|--------|
| Search                     | Actions | Details | Query                                                                                             | Results | Time     |        |
| #4                         | ...     | >       | Search: (biliary sludge[Title/Abstract]) OR (microlithiasis[Title/Abstract]) Sort by: Most Recent | 1,682   | 03:37:30 |        |

## 2. Literature database

### 2.1 Research Paper Dataset Summary (Quality Assessment included)

#### Microlithiasis Legend (Research Paper):

- a. Crystal-based
- b. Small stones
- c. Hyperechoic signal (no acoustic shadowing)  
Hyperechoic signal (with or without acoustic shadowing)  
Hyperechoic shape (with or without acoustic shadow)  
Hyperechoic specks of calcification (with or without posterior acoustic shadowing)  
Hyperechoic focus (with or without acoustic shadow)  
Hyperechoic circumscribed bile duct content (with or without acoustic shadowing)  
Hyperechoic spots  
Echogenic images (mobile, non-shadowing)  
Echogenic material (without acoustic shadowing)

#### Biliary Sludge Legend (Review + Research Articles)

- a. Fluid substance / Fluid-fluid interface / Fluid-fluid level / Calculi / Sediment / Cholesterol monohydrate crystals mixed with bilirubin granules / Calcium bilirubinate granules or cholesterol crystals / Suspension of crystals (usually cholesterol monohydrate) / Multiple nonshadowing calculi, pus, cholesterol crystals / Filling defects or obstruction of the bile ducts with a pluglike appearance / Filling defect in cholangiogram / Non-movable mass-like lesion + absence of internal vascularity / A mixture of particulate matter and bile that occurs when various solutes in bile precipitate / Viscous precipitate containing mucin, cholesterol and calcium bilirubinate
- b. Layers in the dependent portion of the gallbladder
- c. Low amplitude echoes (No acoustic shadowing/with or without shadowing)
- d. Hyperechoic mobile images (no acoustic shadowing) / Hyperechoic specks of calcification  
Hyperechoic aggregates / Slightly hyperechoic material  
Higher echo levels lesions / Echogenic Lesion / Echogenic foci / Echogenic material  
Isoechoic shadow / Presence of echoes in gallbladder (no acoustic shadowing)  
Echogenic, mobile debris / Echogenic material inside the gallbladder / Echogenic or flecks of brightly echogenic material / Mobile echoes / Echogenic material / Homogeneous echoes or heterogeneous echoes
- e. Size (Yes/No)  
2 to 5 mm  
< 2 mm
- f. Localisation mentioned? Yes/No / Localisation: GB / Localisation: GB + CBD / Localisation: CBD / Localisation: NM

| Study                                                      | Study type / Population                                                                                                                                                              | Date        | Total number of patients | Age (mean/ range or SD) | Sex (female) | No. of patients (Sludge) | No. of patients (Microfilthiasis) | Control | Diagnostics                | Lab values                    | Microliths (Definition) | Microlith (mm) | Sludge (Definition)                                                                                                                                    | Treatment                                                        |
|------------------------------------------------------------|--------------------------------------------------------------------------------------------------------------------------------------------------------------------------------------|-------------|--------------------------|-------------------------|--------------|--------------------------|-----------------------------------|---------|----------------------------|-------------------------------|-------------------------|----------------|--------------------------------------------------------------------------------------------------------------------------------------------------------|------------------------------------------------------------------|
| 1. Allen et al., <i>Am J Surg.</i> 1981                    | <u>Study type:</u> Prospective<br><u>Population:</u> Clinical findings and sonograms of all patients in whom sludge was found on routine abdominal sonography a                      | 1977 - 1979 | 97                       | NM                      | NM           | 97                       | 0                                 | 0       | US, Bile microscopy        | NM                            | NM                      | NM             | a.Fluid substance<br>b.Layers in the dependent portion of the gallbladder<br>c.Low amplitude echoes<br>f. Localisation: GB                             | NM                                                               |
| 2. Lee et al., <i>Gastroenterology.</i> 1986               | <u>Study type:</u> Prospective<br><u>Population:</u> Upper abdominal pain + abdominal ultrasound + Sludge                                                                            | 1979 - 1982 | 121                      | NM                      | NM           | 121                      | 0                                 | 0       | US, Bile microscopy<br>CHE | NM                            | NM                      | NM             | b.Layers in the dependent portion of the gallbladder<br>c.Low amplitude echoes (no acoustic shadowing)<br>f. Localisation: GB                          | NM                                                               |
| 3. Lee et al., <i>Gastroenterology.</i> 1988               | <u>Study type:</u> Prospective<br><u>Population:</u> Sludge + other biliary and pancreatic abnormalities were absent on ultrasound examination                                       | 1979 - 1984 | 96                       | NM                      | NM           | 96                       | 0                                 | 0       | US, Bile microscopy        | NM                            | NM                      | NM             | b.Layers in the dependent portion of the gallbladder<br>c.Low amplitude echoes (no acoustic shadowing)<br>f. Localisation: GB                          | CHE (6 patients with sludge associated with severe biliary pain) |
| 4. Ohara et al., <i>J Clin Gastroenterol.</i> 1990         | <u>Study type:</u> Retrospective<br><u>Population:</u> Retrospective review of patients with ultrasonographic diagnosis of biliary tract sludge                                      | 1979 - 1985 | 87                       | NM                      | NM           | 87                       | 0                                 | 0       | US                         | Bilirubin, AP, AST.           | NM                      | NM             | a.Biliary contents<br>b.Layers in the dependent portion of the gallbladder<br>c.Low amplitude echoes (no acoustic shadowing)<br>f. Localisation: GB    | CHE (7 patients with sludge)                                     |
| 5. Ros et al., <i>Gastroenterology.</i> 1991               | <u>Study type:</u> Prospective<br><u>Population:</u> 64 consecutive patients convalescing from a recent episode of acute pancreatitis of unknown cause                               | 1979 - 1989 | 64                       | 62 (18 - 88)            | 5            | 10                       | 0                                 | 16      | US, Bile microscopy, CHE   | GGTP, ALT                     | a.Crystal-based         | NM             | d.Hyperechoic mobile images (no acoustic shadowing)<br>f. Localisation: NM                                                                             | CHE, UDCA (for CMC/CBG patients)                                 |
| 6. Buscail et al., <i>Dig Dis Sci.</i> 1992                | <u>Study type:</u> Prospective<br><u>Population:</u> 50 patients with proven stones (Group 1) + 22 patients with suspected microfilthiasis (Group 2)                                 | 1987 - 1988 | 72                       | 66                      | 35           | 0                        | 7                                 | 0       | US, Bile microscopy, ERCP  | AST, ALT, AP, Bilirubin, GGTP | NM                      | < 3            | NM                                                                                                                                                     | NM                                                               |
| 7. Delchier et al., <i>Hepatology</i> 1986                 | <u>Study type:</u> Prospective<br><u>Population:</u> Microscopic bile examination in patients free of stones (Group 1), with proven stones (Group 2) and suspected stones (Group 3)  | 1985***     | 79                       | 44                      | 32           | 7                        | 10                                | 16      | US, Bile microscopy, Other | AP, ALT                       | NM                      | <3             | d.Presence of echoes in gallbladder (no acoustic shadowing)<br>f. Localisation: GB                                                                     | CHE (9 patients of group 3)                                      |
| 8. Lee et al., <i>New England Journal of Medicine</i> 1992 | <u>Study type:</u> Prospective<br><u>Population:</u> Patients with acute idiopathic pancreatitis                                                                                     | 1980 - 1988 | 86                       | 64 (29 - 83)            | 47           | 23                       | 0                                 | 0       | US, Bile microscopy,       | NM                            | NM                      | NM             | b.Layers in the dependent portion of the gallbladder<br>c.Low amplitude echoes (no acoustic shadowing)<br>d.Mobile echoes<br>f. Localisation: GB       | CHE, ERCP                                                        |
| 9. Murray et al., <i>Gut</i> 1992                          | <u>Study type:</u> Prospective<br><u>Population:</u> Incidence of biliary sludge in a prospective study of 36 patients admitted to the intensive care unit for longer than two days. | 1991***     | 36                       | 47 (17 - 80)            | 10           | 17                       | 0                                 | 0       | US                         | NM                            | NM                      | NM             | b.Layers in the dependent portion of the gallbladder<br>c.Low amplitude echoes (no acoustic shadowing)<br>d. Echogenic material<br>f. Localisation: GB | NM                                                               |

| Study                                              | Study type / Population                                                                                                                                                                                                                                                                                                        | Date        | Total number of patients                        | Age (mean/ range or SD)               | Sex (female)                          | No. of patients (Sludge)               | No. of patients (Microolithiasis)      | Control                                                                        | Diagnostics          | Lab values                    | Microoliths (Definition)                                                          | Microolith (mm) | Sludge (Definition)                                                                                                                                                                                              | Treatment |
|----------------------------------------------------|--------------------------------------------------------------------------------------------------------------------------------------------------------------------------------------------------------------------------------------------------------------------------------------------------------------------------------|-------------|-------------------------------------------------|---------------------------------------|---------------------------------------|----------------------------------------|----------------------------------------|--------------------------------------------------------------------------------|----------------------|-------------------------------|-----------------------------------------------------------------------------------|-----------------|------------------------------------------------------------------------------------------------------------------------------------------------------------------------------------------------------------------|-----------|
| <b>10. Maringhini et al., Ann Intern Med. 1993</b> | <u>Study type:</u><br>Prospective<br><br><u>Population:</u><br>To evaluate the incidence and symptoms of and risk factors for biliary sludge and gallstones during pregnancy                                                                                                                                                   | 1986 - 1988 | 272                                             | 27                                    | 272                                   | 42                                     | 0                                      | 213                                                                            | US                   | NM                            | NM                                                                                | NM              | c.Low amplitude echoes (no acoustic shadowing)<br>d. Homogeneous echoes or heterogeneous echoes<br>e. Size: 2 to 5 mm<br>f. Localisation: NM                                                                     | NM        |
| <b>11. Toursarkissian et al., South Med J 1995</b> | <u>Study type:</u><br>Prospective<br><br><u>Population:</u><br>Biliary sludging in critically ill trauma patients                                                                                                                                                                                                              | 1995***     | 19                                              | 42 (16 - 69)                          | 10                                    | 14/19                                  | 0                                      | 0                                                                              | US                   | AST, ALT, AP, Bilirubin,      | NM                                                                                | NM              | a.Cholesterol monohydrate crystals mixed with bilirubin granules<br>b.Layers in the dependent portion of the gallbladder<br>c.Low amplitude echoes (no acoustic shadowing)<br>f. Localisation: NM                | NM        |
| <b>12. Barton et al., AJR Am J Roentgenol 1995</b> | <u>Study type:</u><br>Retrospective<br><br><u>Population:</u><br>The purpose of this study was to review the imaging findings of biliary sludge occurring after liver transplantation and to determine the relative merits of various imaging procedures (cholangiography, CT, and sonography) for establishing the diagnosis. | 1995***     | 352 patients (400 transplanted livers)          | 47 (1 - 68)                           | 148                                   | 51/400 (transplanted livers)           | 0                                      | 0                                                                              | US, CT, Other        | NM                            | NM                                                                                | NM              | a. Filling defects or obstruction of the bile ducts with a pluglike appearance seen on cholangiograms or material confined to the lumen of the bile ducts seen on sonograms or CT scans.<br>f. Localisation: CBD | NM        |
| <b>13. Barton et al., AJR Am J Roentgenol 1995</b> | <u>Study type:</u><br>Retrospective<br><br><u>Population:</u><br>Outcome of several forms of treatment for biliary sludge occurring after liver transplantation                                                                                                                                                                | 1995***     | 47                                              | 28 (4 - 68)                           | 19                                    | 51/400                                 | 0                                      | 0                                                                              | Other                | NM                            | NM                                                                                | NM              | a. Filling defects or obstruction of the bile ducts with a pluglike appearance seen on cholangiograms or material confined to the lumen of the bile ducts seen on sonograms or CT scans.<br>f. Localisation: CBD | Other     |
| <b>14. Dill et al., Endoscopy 1995</b>             | <u>Study type:</u><br>Prospective<br><br><u>Population:</u><br>Use of combined EUS + stimulated biliary drainage in the diagnosis of cholecystitis and microlithiasis                                                                                                                                                          | 1995***     | 66                                              | NM (Reference to earlier publication) | NM (Reference to earlier publication) | 58/66 (biliary sludge or small stones) | 58/66 (biliary sludge or small stones) | 10 (Patients with biliary pain + possibly sludge evidence but without surgery) | Bile microscopy, EUS | NM                            | No specific distinction between microlithiasis and sludge (see sludge definition) | NM              | a.Biliary Drainage was considered positive if calcium bilirubinate granules or cholesterol crystals were noted microscopically.<br>f. Localisation: GB + CBD                                                     | CHE       |
| <b>15. Marotta et al., Can J Gastroenterol</b>     | <u>Study type:</u><br>Retrospective<br><br><u>Population:</u><br>Ultrasound examinations of patients with idiopathic pancreatitis, patients with acute alcohol-associated pancreatitis and a control group were compared. Biliary sludge was found in seven of 21 patients (33%) with idiopathic pancreatitis                  | 1989 - 1992 | 83 (+ 63 control without age, sex distribution) | 53 (20 - 92)                          | 42                                    | 10                                     | 0                                      | 63                                                                             | US                   | AST, ALT, AP, Bilirubin, GGTP | NM                                                                                | NM              | a.Fluid-fluid interface<br>b.Layers in the dependent portion of the gallbladder<br>c.Low amplitude echoes (no acoustic shadowing)<br>f. Localisation: GB                                                         | CHE       |
| <b>16. Tandon et al., Gut 1997</b>                 | <u>Study type:</u><br>Prospective<br><br><u>Population:</u><br>To study prospectively the incidence of gallstones and gall bladder contractility in patients with spinal cord injury                                                                                                                                           | 1993 - 1994 | 73                                              | 31                                    | 18                                    | 14                                     | 0                                      | 36                                                                             | US                   | AST, ALT, AP, Bilirubin, GGTP | NM                                                                                | NM              | b.Layers in the dependent portion of the gallbladder ("gravity dependent")<br>c.Low amplitude echoes (no acoustic shadowing)<br>d. Echogenic material inside the gallbladder<br>f. Localisation: GB              | NM        |



| Study                                                | Study type/Population                                                                                                                                                                                                                                                              | Date        | Total number of patients | Age (mean/ range or SD) | Sex (female) | No. of patients (Sludge)                                               | No. of patients (Microolithiasis)                        | Control | Diagnostics                                             | Lab values          | Microoliths (Definition)                     | Microolith (mm) | Sludge (Definition)                                                                                                                                | Treatment |
|------------------------------------------------------|------------------------------------------------------------------------------------------------------------------------------------------------------------------------------------------------------------------------------------------------------------------------------------|-------------|--------------------------|-------------------------|--------------|------------------------------------------------------------------------|----------------------------------------------------------|---------|---------------------------------------------------------|---------------------|----------------------------------------------|-----------------|----------------------------------------------------------------------------------------------------------------------------------------------------|-----------|
| 17. Sharma et al., Gastroenterology 1997             | <b>Study type:</b> Prospective<br><b>Population:</b> The aim of this study was to determine the abnormalities of gallbladder emptying and bile composition in patients with microolithiasis.                                                                                       | 1998***     | 10                       | 42                      | 4            | 0                                                                      | 10                                                       | 10      | US, Bile microscopy                                     | NM                  | a.Crystal-based<br>b.Small stones            | < 3             | NM                                                                                                                                                 | UDCA      |
| 18. Grau et al., Int J Pancreatol. 1999              | <b>Study type:</b> Retrospective<br><b>Population:</b> We assessed the diagnostic usefulness of alanine aminotransferase (ALT) and aspartate aminotransferase (AST) for identification of occult microolithiasis in idiopathic acute pancreatitis.                                 | 1989 - 1996 | 91                       | 57                      | 33           | 0                                                                      | 91                                                       | 0       | Bile microscopy, US                                     | AST, ALT            | a.Crystal-based                              | NM              | NM                                                                                                                                                 | NM        |
| 19. Frossard et al., Am J Med. 2000                  | <b>Study type:</b> Prospective<br><b>Population:</b> The aim of this study was to evaluate the usefulness of endoscopic ultrasonography in the diagnosis of biliary tract pathology or chronic pancreatitis in these patient                                                       | 1991 – 1995 | 168                      | 50 (10 – 84)            | 66           | 12                                                                     | NM<br>*Gallstones not discriminated from microolithiasis | 0       | EUS                                                     | NM                  | c.Hyperechoic signal (no acoustic shadowing) | 0.5 – 2         | c.Low amplitude echoes (no acoustic shadowing)<br>d. Moving echoes<br>f.Localisation: GB                                                           | NM        |
| 20. Materne et al., Endoscopy 2000                   | <b>Study type:</b> Prospective<br><b>Population:</b> The aim of this study was to compare prospectively the diagnostic efficacy of magnetic resonance (MR) imaging and endoscopic ultrasonography (EUS) in extrahepatic biliary obstruct                                           | 2000***     | 50                       | 59 (16 – 90)            | 27           | 4                                                                      | 0                                                        | 0       | EUS, MRI                                                | AP, Bilirubin, GGTP | NM                                           | NM              | c.Low amplitude echoes (no acoustic shadowing)<br>e.Size: < 2 mm<br>f. Localisation: CBD                                                           | ERCP      |
| 21. Petroni et al., Eur J Gastroenterol Hepatol 2000 | <b>Study type:</b> Prospective<br><b>Population:</b> To assess risk factors for gallstone recurrence following non-surgical treatment                                                                                                                                              | 1987 – 1991 | 163                      | 47 (18 – 79)            | 121          | 9                                                                      | 0                                                        | 0       | US, Other                                               | NM                  | NM                                           | NM              | a.Fluid substance<br>b.Layers in the dependent portion of the gallbladder<br>c.Low amplitude echoes (no acoustic shadowing)<br>f. Localisation: GB | Other     |
| 22. Méndez-Sánchez et al., J Nutr. 2001              | <b>Study type:</b> Prospective<br><b>Population:</b> Fish oil (n:3) polyunsaturated fatty acids beneficially affect biliary cholesterol nucleation time in obese women losing weight                                                                                               | 2001***     | 35                       | 38                      | 35           | 0                                                                      | 0                                                        | 11      | US                                                      | NM                  | NM                                           | NM              | a.fluid-fluid level<br>c.Low amplitude echoes (no acoustic shadowing)<br>f. Localisation: NM                                                       | UDCA PUFA |
| 23. Tandon et al., Am J Gastro 2001                  | <b>Study type:</b> Retrospective<br><b>Population:</b> The aim of this study was to determine the utility of endoscopic ultrasound (EUS) in patients with unexplained acute pancreatitis, and whether endoscopic retrograde cholangiopancreatography (ERCP) is subsequently needed | 2001***     | 31                       | 49 (19 – 87)            | 19           | 5* (no difference between sludge and microolithiasis is patients made) | 5*                                                       | 0       | US, CT, ERCP, EUS, MRI + MRCP<br>Bile microscopy, Other | NM                  | a.Crystal-based                              | NM              | c.No acoustic shadowing<br>d.Echogenic or flecks of brightly echogenic material<br>f. Gallbladder + CBD                                            | NM        |

| Study                                              | Study type/Population                                                                                                                                                                                                                                                             | Date        | Total number of patients | Age (mean/ range or SD) | Sex (female) | No. of patients (Sludge)            | No. of patients (Microolithiasis)    | Control | Diagnostics                  | Lab values          | Microoliths (Definition)          | Microolith (mm) | Sludge (Definition)                                                                                                           | Treatment        |
|----------------------------------------------------|-----------------------------------------------------------------------------------------------------------------------------------------------------------------------------------------------------------------------------------------------------------------------------------|-------------|--------------------------|-------------------------|--------------|-------------------------------------|--------------------------------------|---------|------------------------------|---------------------|-----------------------------------|-----------------|-------------------------------------------------------------------------------------------------------------------------------|------------------|
| 24. Kohut et al., World J Gastroenterol. 2002      | <b>Study type:</b> Prospective<br><b>Population:</b> This prospective study was done to investigate the presence and density of CBDM in patients with ABP, when endoscopic retrograde cholangiopancreatography (ERCP) was done in different periods from the onset of the disease | 1993 – 1997 | 151                      | 54                      | 102          | 0                                   | 118                                  | 33      | US, Bile microscopy CT, ERCP | AST, ALT, Bilirubin | a.Crystal-based                   | NM              | NM                                                                                                                            | ERCP             |
| 25. Kubota et al., J Gastroenterol Hepatol. 2002   | <b>Study type:</b> Prospective<br><b>Population:</b> We examined the role of biliary intra ductal ultrasonography in detecting common bile duct stones that had been overlooked during endoscopic retrograde cholangiopancreatography.                                            | 1997 – 2001 | 80                       | 61 (30 – 89)            | 43           | 37 (only sludge)                    | NM (*not specified -> Stones < 5 mm) | 0       | US, ERCP, IDUS               | AP, GGTP            | NM                                | NM              | c.Low amplitude echoes (no acoustic shadowing)<br>f. Localisation: NM                                                         | ERCP             |
| 26. Calvo et al., J Clin Gastroenterol. 2002       | <b>Study type:</b> Prospective<br><b>Population:</b> Magnetic resonance cholangiography versus ultrasound in the evaluation of the gallbladder                                                                                                                                    | 2002***     | 80                       | 69                      | 36           | 13 (sludge = microlithiasis)        | 13 (sludge = microlithiasis)         | 0       | US, MRCP                     | NM                  | b.Small stones                    | <3              | NM                                                                                                                            | CHE              |
| 27. Ierardi et al., Aliment Pharmacol Ther. 2003   | <b>Study type:</b> Prospective<br><b>Population:</b> To verify the impact of second harmonic imaging compared with conventional ultrasonography on the detection of biliary sludge in patients with 'idiopathic' pancreatitis                                                     | 2000 – 2001 | 50                       | 51 (46 – 60)            | 36           | 41/50 diagnosed via bile microscopy | NM                                   | 0       | US, Bile microscopy          | NM                  | NM                                | NM              | a.Multiple nonshadowing calculi, pus, cholesterol crystals<br>c.No acoustic shadowing<br>f.Localisation: NM                   | CHE              |
| 28. Rashdan et al., Gastrointest Endosc. 2003      | <b>Study type:</b> Retrospective<br><b>Population:</b> This study examined the frequency at which biliary crystals are found in patients with suspected type II and type III sphincter of Oddi dysfunction                                                                        | 2003***     | 85                       | 38                      | 66           | 0                                   | 3                                    | 0       | Bile microscopy, ERCP, Other | NM                  | a.Crystal-based                   | < 3             | NM                                                                                                                            | ERCP             |
| 29. Ponce et al., Eur J Nucl Med Mol Imaging. 2004 | <b>Study type:</b> Prospective<br><b>Population:</b> Quantitative cholescintigraphy and bile abnormalities in patients with acalculous biliary pain                                                                                                                               | 2004***     | 92                       | 47                      | 83           | 0                                   | 32                                   | NM      | Bile microscopy              | NM                  | b. Small stones                   | <3              | NM                                                                                                                            | CHE              |
| 30. Saraswat et al., J Gastroenterol Hepatol. 2004 | <b>Study type:</b> Prospective<br><b>Population:</b> Frequency of microlithiasis and response to treatment in recurrent idiopathic acute pancreatitis (RIAP) and unexplained biliary pain                                                                                         | 2004***     | 70                       | 35 (14 – 58)            | 42           | NM                                  | 28                                   | 34      | Bile microscopy              | NM                  | a.Crystal-based<br>b.Small stones | < 3             | NM                                                                                                                            | ERCP, CHE, UDCA  |
| 31. Ko et al., Hepatology 2005                     | <b>Study type:</b> Prospective<br><b>Population:</b> This study prospectively evaluated the incidence and natural history of pregnancy-related gallbladder sludge and stones in the US                                                                                            | 2005***     | 3254                     | NM                      | 3254         | 48                                  | NM                                   | 3206    | US                           | NM                  | a.Crystal-based                   | < 2             | b.Layers in the dependent portion of the gallbladder<br>c.Low amplitude echoes (no acoustic shadowing)<br>f. Localisation: GB | CHE (postpartum) |

| Study                                              | Study type/Population                                                                                                                                                                                                                               | Date        | Total number of patients | Age (mean/ range or SD) | Sex (female) | No. of patients (Sludge)                      | No. of patients (Microolithiasis)             | Control | Diagnostics                        | Lab values         | Microoliths (Definition)                                                            | Microolith (mm) | Sludge (Definition)                                                                                                                 | Treatment   |
|----------------------------------------------------|-----------------------------------------------------------------------------------------------------------------------------------------------------------------------------------------------------------------------------------------------------|-------------|--------------------------|-------------------------|--------------|-----------------------------------------------|-----------------------------------------------|---------|------------------------------------|--------------------|-------------------------------------------------------------------------------------|-----------------|-------------------------------------------------------------------------------------------------------------------------------------|-------------|
| 32. Mirbargheri et al., J Gastrointest Surg. 2005  | <b>Study type:</b> Prospective<br><b>Population:</b> To investigate the role of endoscopic ultrasonography (EUS) in the diagnosis of microlithiasis in patients with upper abdominal pain and normal TUS                                            | 2001 – 2003 | 35                       | 48 (+/- 13.1)           | 21           | 33 (Gallbladder sludge and/or microlithiasis) | 33 (Gallbladder sludge and/or microlithiasis) | 0       | US, EUS                            | AP                 | c.Hyperechoic specks of calcification, with or without posterior acoustic shadowing | < 3             | c.with or without posterior acoustic shadowing<br>d.Hyperechoic specks of calcification,<br>f. Gallbladder + Bile duct              | ERCP, CHE   |
| 33. Rocca et al., Gastrointest Endosc. 2006        | <b>Study type:</b> Prospective<br><b>Population:</b> This study evaluates a new approach in the management of common bile duct stones, by using an oblique-viewing echoendoscope.                                                                   | 2006***     | 19                       | 62 (44 – 74)            | 12           | 12                                            | 0                                             | 0       | US, EUS, MRCP, ERCP (+ EURCP)      | AST, ALT, AP, GGTP | NM                                                                                  | NM              | c/d. Hyperechoic aggregates (no acoustic shadowing)<br>e.Size: < 2 mm<br>f. Gallbladder + Bile duct                                 | ERCP, Other |
| 34. Bolukbas et al., J Gastroenterol Hepatol. 2006 | <b>Study type:</b> Prospective<br><b>Population:</b> To define the risk factors in gallstone and sludge formation, and to investigate the incidence of gallstone and biliary sludge formation during pregnancy in a group of healthy pregnant women | 2006***     | 97                       | 25 (19 – 35)            | 97           | 7                                             | 0                                             | 28      | US                                 | NM                 | NM                                                                                  | NM              | c.Low amplitude echoes<br>f. Localisation: GB                                                                                       | NM          |
| 35. Garg et al., Clin Gastroenterol Hepatol. 2007  | <b>Study type:</b> Prospective<br><b>Population:</b> The aim of the present study was to determine the cause of idiopathic RAP in a long-term follow-up study.                                                                                      | 1995 – 2003 | 75                       | 32 (14 – 67)            | 15           | 0                                             | 10                                            | 0       | US, CT, EUS, Bile microscopy, ERCP | NM                 | a.Crystal-based                                                                     | < 3             | b.Layers in the dependent portion of the gallbladder<br>c.Low amplitude echoes (no acoustic shadowing)<br>f. Localisation: GB       | ERCP, CHE   |
| 36. Inoue et al., Ultrasound Med Biol. 2007        | <b>Study type:</b> Prospective<br><b>Population:</b> We evaluated the usefulness of contrast-enhanced ultrasonography(US) for detecting and differentiating gallbladder lesions.                                                                    | 2000 – 2005 | 90                       | 67 (51 – 84)            | 35           | 42                                            | 0                                             | 0       | CEUS                               | NM                 | NM                                                                                  | NM              | b.Layers in the dependent portion of the gallbladder<br>d.Echogenic Lesion<br>f. Localisation: GB                                   | CHE         |
| 37. Numata et al., J Ultrasound Med. 2007          | <b>Study type:</b> Prospective<br><b>Population:</b> We evaluated the usefulness of contrast-enhanced harmonic gray scale ultrasonographic findings for differential diagnosis of gallbladder diseases.                                             | 2002 – 2006 | 33                       | 62 (26 – 87)            | 13           | 12                                            | 0                                             | 0       | CEUS, CT                           | NM                 | NM                                                                                  | NM              | d. Higher echo levels lesions<br>f. Localisation: GB                                                                                | NM          |
| 38. Okoro et al., Gastrointest Endosc. 2008        | <b>Study type:</b> RCT<br><b>Population:</b> To identify bile microlithiasis in patients with postcholecystectomy pain and to investigate the therapeutic effect of ursodeoxycholi                                                                  | 2001 – 2006 | 118                      | NM                      | 10           | 0                                             | 12                                            | 6       | Bile microscopy                    | NM                 | a.Crystal-based                                                                     | NM              | NM                                                                                                                                  | UDCA        |
| 39. Bastouly et al., Obes Surg. 2009               | <b>Study type:</b> Prospective<br><b>Population:</b> Early changes in postprandial gallbladder emptying in morbidly obese patients undergoing Roux-en-Y gastric bypass: correlation with the occurrence of biliary sludge and gallstones            | 2008***     | 20                       | 39 (28 – 59)            | 16           | 13                                            | 0                                             | 0       | US                                 | NM                 | NM                                                                                  | NM              | b.Layers in the dependent portion of the gallbladder<br>c.Low amplitude echoes (no acoustic shadowing)<br>f. Localisation: GB + CBD | Other       |

| Study                                                      | Study type/Population                                                                                                                                                                                                                                                                                                                   | Date        | Total number of patients | Age (mean/ range or SD) | Sex (female) | No. of patients (Sludge)               | No. of patients (Microolithiasis)      | Control | Diagnostics                     | Lab values                    | Microoliths (Definition)                                    | Microolith (mm) | Sludge (Definition)                                                                                                                                                                             | Treatment |
|------------------------------------------------------------|-----------------------------------------------------------------------------------------------------------------------------------------------------------------------------------------------------------------------------------------------------------------------------------------------------------------------------------------|-------------|--------------------------|-------------------------|--------------|----------------------------------------|----------------------------------------|---------|---------------------------------|-------------------------------|-------------------------------------------------------------|-----------------|-------------------------------------------------------------------------------------------------------------------------------------------------------------------------------------------------|-----------|
| <b>40. Kim et al., Dig Dis Sci. 2010</b>                   | <u>Study type:</u> Prospective<br><u>Population:</u> We compared the echogenicity seen on IDUS and the findings of bile microscopy (BM) of bile that was collected in the common bile duct (CBD) to determine whether the echogenicity seen on IDUS is real microlithiasis.                                                             | 2006 – 2007 | 30                       | 43 (21 – 77)            | 15           | 7                                      | 14                                     | 0       | IDUS, ERCP, Bile microscopy     | AST, ALT, Bilirubin AP        | b.Small stones                                              | < 3             | NM                                                                                                                                                                                              | ERCP      |
| <b>41. Elmi et al., Dig Dis Sci. 2010</b>                  | <u>Study type:</u> Retrospective<br><u>Population:</u> Biliary sphincter of Oddi dysfunction type I versus occult biliary microlithiasis in post-cholecystectomy patients: are they both part of the same clinical entity?                                                                                                              | 1997 – 2006 | 17                       | 51 (+/- 17)             | 16           | 0                                      | 9                                      | 0       | ERCP, Other                     | AST, ALT, Bilirubin AP        | b.Small stones                                              | < 3             | NM                                                                                                                                                                                              | ERCP      |
| <b>42. Mesotten et al., J Clin Endocrinol Metab. 2009</b>  | <u>Study type:</u> Prospective<br><u>Population:</u> We examined liver dysfunction and biliary sludge prospectively in a large medical long-stay ICU population and hypothesized that tight glycemic control with intensive insulin therapy (IIT) reduces cholestasis and biliary sludge.                                               | 2009***     | 658                      | 63                      | 255          | 250                                    | 0                                      | 323     | US                              | AST, ALT, AP, Bilirubin, GGTP | NM                                                          | NM              | b.Layers in the dependent portion of the gallbladder<br>c.Low amplitude echoes (no acoustic shadowing)<br>f.Localisation: GB                                                                    | Other     |
| <b>43. Baltas et al., Singapore Med J. 2009</b>            | <u>Study type:</u> Prospective<br><u>Population:</u> Gallstones and biliary sludge in Greek patients with complete high spinal cord injury: an ultrasonographical evaluation                                                                                                                                                            | 2004 – 2007 | 156                      | 35 (19 – 59)            | 40           | 15                                     | 0                                      | 78      | US                              | NM                            | NM                                                          | NM              | a.Fluid -fluid level with changes in the patient position<br>b.Layers in the dependent portion of the gallbladder<br>c.Low amplitude echoes (no acoustic shadowing)<br>f.Localisation: GB + CBD | NM        |
| <b>44. Vila et al., Scand J Gastroenterol. 2010</b>        | <u>Study type:</u> Prospective<br><u>Population:</u> To evaluate the diagnostic yield of endoscopic ultrasonography (EUS) in patients with idiopathic acute pancreatitis (IAP), find factors predictive of a positive EUS finding in these patients and investigate whether these etiological findings are maintained during follow-up. | 2004 – 2007 | 44                       | 61 (23 – 83)            | 13           | 1                                      | 22                                     | 0       | EUS, MRCP, CT, Bile microscopy, | NM                            | a.Crystal-based<br>c.Mobile, non-shadowing echogenic images | NM              | b.Layers in the dependent portion of the gallbladder<br>c. No acoustic shadowing<br>d.Echogenic material<br>f.Localisation: GB + CBD                                                            | NM        |
| <b>45. Ardengh et al., Rev Assoc Med Bras (1992). 2010</b> | <u>Study type:</u> Prospective<br><u>Population:</u> Our objective was to evaluate results from endoscopic ultrasonography (EUS) for diagnosis of gallbladder microlithiasis in patients with unexplained (idiopathic) acute pancreatitis.                                                                                              | 2010***     | 36                       | 47 (20 – 83)            | 21           | 0                                      | 29                                     | 0       | EUS                             | NM                            | c. Hyperechoic signal with or without acoustic shadowing.   | 0.5 – 3         | NM                                                                                                                                                                                              | ERCP, CHE |
| <b>46. Ortega et al., Pancreas. 2011</b>                   | <u>Study type:</u> Prospective<br><u>Population:</u> Prospective comparison of endoscopic ultrasonography and MRCP in the etiological diagnosis of "idiopathic" acute pancreatitis                                                                                                                                                      | 2005 – 2009 | 49                       | 58 (+/- 17)             | 25           | 12 *<br>Cholelithiasis/ biliary sludge | 12 *<br>Cholelithiasis/ biliary sludge | 0       | EUS, MRCP                       | NM                            | c. Hyperechoic shape with or without acoustic shadow        | NM              | b.Layers in the dependent portion of the gallbladder<br>c. No acoustic shadowing<br>d.Slightly hyperechoic material<br>f.Localisation: GB                                                       | ERCP, CHE |

| Study                                                  | Study type/Population                                                                                                                                                                                                                             | Date                        | Total number of patients | Age (mean/ range or SD) | Sex (female) | No. of patients (Sludge) | No. of patients (Microoliths)                    | Control | Diagnostics             | Lab values                    | Microoliths (Definition) | Microolith (mm) | Sludge (Definition)                                                                                                               | Treatment |
|--------------------------------------------------------|---------------------------------------------------------------------------------------------------------------------------------------------------------------------------------------------------------------------------------------------------|-----------------------------|--------------------------|-------------------------|--------------|--------------------------|--------------------------------------------------|---------|-------------------------|-------------------------------|--------------------------|-----------------|-----------------------------------------------------------------------------------------------------------------------------------|-----------|
| 47. Endo et al., Dig Endosc. 2011                      | <b>Study type:</b> Retrospective<br><b>Population:</b> The aim of the present study was to elucidate adequate indications for IDUS in cases that undergo endoscopic retrograde cholangio-pancreatography (ERCP) due to suspected bile duct stones | 2005 – 2006                 | 213                      | 72 (30 – 94)            | 99           | 8                        | 0                                                | 0       | ERCP, IDUS              | NM                            | NM                       | NM              | c. No acoustic shadowing<br>d. Echogenic foci<br>f. Localisation: CBD                                                             | ERCP      |
| 48. Zhan et al., J Gastroenterol Hepatol. 2011         | <b>Study type:</b> Retrospective<br><b>Population:</b> The aim of the present study was to evaluate the role of EUS in exploring the unknown etiology of mild acute biliary pancreatitis.                                                         | 2006 – 2009                 | 33                       | 46 (+/- 21)             | 20           | 2                        | NM * stones between 2.2 mm to 5.2 mm in 11 cases | NM      | US, EUS, CT, MRCP, ERCP | NM                            | b. Small stones          | < 3             | d. Isoechoic shadow<br>f. Localisation: NM                                                                                        | ERCP      |
| 49. Wang et al. Digestion. 2012                        | <b>Study type:</b> RCT<br><b>Population:</b> Effect of ursodeoxycholic acid administration after liver transplantation on serum liver tests and biliary complications                                                                             | 2005 – 2008                 | 112                      | 33                      | 18           | 10                       | 10                                               | 56      | MRCP, ERCP              | AST, ALT, AP, GGTP, Bilirubin | NM                       | NM              | a. Filling defect in cholangiogram<br>f. Localisation: NM                                                                         | UDCA      |
| 50. Rana et al., Ann Gastroenterol. 2012               | <b>Study type:</b> Retrospective<br><b>Population:</b> The aim of our study was to retrospectively report our experience with endoscopic ultrasound (EUS) in investigating patients with IAP.                                                     | 2012*** (three year period) | 40                       | NM (17 – 72)            | 14           | 16                       | NM                                               | 0       | US, CT, MRCP, ERCP, EUS | AST, ALT, AP, Bilirubin, GGTP | NM                       | NM              | b. Layers in the dependent portion of the gallbladder<br>c. No acoustic shadowing<br>d. Echogenic material<br>f. Localisation: GB | ERCP, CHE |
| 51. Cheong et al., World J Gastrointest Endosc 2013    | <b>Study type:</b> Retrospective<br><b>Population:</b> To evaluate the efficacy of endoscopic ultrasonography (EUS) in patients with elevated carbohydrate antigen (CA) 19-9 levels of obscure origin.                                            | 2007 – 2009                 | 17                       | 51 (28 – 85)            | 13           | 16                       | 0                                                | 0       | CT, EUS                 | NM                            | NM                       | NM              | a. Suspension of crystals (usually cholesterol monohydrate)<br>f. Localisation: GB + CBD                                          | UDCA      |
| 52. Wong et al., J Clin Gastroenterol. 2013            | <b>Study type:</b> Prospective<br><b>Population:</b> Carbohydrate intake as a risk factor for biliary sludge and stones during pregnancy                                                                                                          | 2013***                     | 3070                     | NM                      | 3070         | 160                      | 0                                                | NM      | US                      | NM                            | NM                       | NM              | b. Layers in the dependent portion of the gallbladder<br>c. Low amplitude echoes (no acoustic shadowing)<br>f. Localisation: GB   | NM        |
| 53. Mathew et al., JPEN J Parenter Enteral Nutr. 2015  | <b>Study type:</b> Prospective<br><b>Population:</b> The aim of this study was to examine the effects of dietary fat and protein intake on incident gallstone disease during pregnancy, a high-risk time for stone formation.                     | 2015***                     | 3070                     | 25 (+/- 4.9)            | 3070         | 314                      | 0                                                | 0       | US                      | NM                            | NM                       | NM              | b. Layers in the dependent portion of the gallbladder<br>c. Low amplitude echoes (no acoustic shadowing)<br>f. Localisation: GB   | NM        |
| 54. Neri et al., Clin Med Insights Gastroenterol. 2014 | <b>Study type:</b> Prospective<br><b>Population:</b> To define a therapeutic program for mild-moderate acute pancreatitis (AP), often recurrent, which at the end of the diagnostic process remains of undefined etiology                         | 2011 – 2012                 | 64                       | 58 (34 – 83)            | 39           | 6                        | 4                                                | 0       | US, CT, EUS, MRCP       | AST, ALT, Bilirubin, GGTP     | b. Small stones          | < 3             | a. Suspension of cholesterol crystals mixed with mucins and cell detritus<br>f. Localisation: NM                                  | ERCP, CHE |

| Study                                                    | Study type/Population                                                                                                                                                                                                                                                                              | Date        | Total number of patients | Age (mean/ range or SD) | Sex (female) | No. of patients (Sludge) | No. of patients (Microolithiasis) | Control | Diagnostics                   | Lab values                    | Microoliths (Definition)                                            | Microolith (mm) | Sludge (Definition)                                                                                                                     | Treatment |
|----------------------------------------------------------|----------------------------------------------------------------------------------------------------------------------------------------------------------------------------------------------------------------------------------------------------------------------------------------------------|-------------|--------------------------|-------------------------|--------------|--------------------------|-----------------------------------|---------|-------------------------------|-------------------------------|---------------------------------------------------------------------|-----------------|-----------------------------------------------------------------------------------------------------------------------------------------|-----------|
| <b>55. Kim et al., Dig Dis Sci. 2014</b>                 | <u>Study type:</u> Prospective<br><u>Population:</u> The aim of this study was to evaluate the accuracy of intra ductal ultrasonography (IDUS) for detecting choledocholithiasis in icteric patients with highly suspected common bile duct (CBD) stones without definite stone diagnosis on ERCP. | 2006 – 2011 | 95                       | 55 (+/- 15.5)           | 44           | 24                       | NM                                | 0       | ERCP, IDUS                    | Bilirubin                     | NM                                                                  | NM              | c. No acoustic shadowing<br>d. Echogenic material<br>f. Localisation: CBD                                                               | ERCP      |
| <b>56. Choi et al., Ultrasonography. 2014</b>            | <u>Study type:</u> Retrospective<br><u>Population:</u> To validate the use of harmonic ultrasonography (US) in the detection of gallbladder Microolithiasis                                                                                                                                        | 2012 – 2014 | 55                       | 53 (+/- 12.9)           | 23           | NM                       | 55                                | 0       | US                            | NM                            | a. Crystal-based<br>b. Small stones                                 | < 3             | NM                                                                                                                                      | NM        |
| <b>57. Anderloni et al., World J Gastroenterol. 2015</b> | <u>Study type:</u> Prospective<br><u>Population:</u> To investigate the clinical usefulness of early endoscopic ultrasonography (EUS) in the management of acute biliary pancreatitis (ABP).                                                                                                       | 2010 – 2012 | 71                       | 58 (27 – 89)            | 38           | NM                       | NM                                | 0       | EUS, Other                    | AST, ALT, AP, Bilirubin, GGTP | NM                                                                  | NM              | c. No acoustic shadowing<br>d. Hyperechoic focus<br>f. Localisation: NM                                                                 | ERCP      |
| <b>58. Rätty et al., Ann Surg. 2015</b>                  | <u>Study type:</u> RCT<br><u>Population:</u> The aim of the present trial was to ascertain whether laparoscopic cholecystectomy (LCC) can prevent recurrent attacks of idiopathic acute pancreatitis (IAP).                                                                                        | 2009 – 2013 | 85                       | 57 (17 – 84)            | 33           | NM                       | NM                                | 46      | US, CT, MRCP, Bile microscopy | AST, ALT, AP, Bilirubin, GGTP | b. Small stones                                                     | < 3             | NM                                                                                                                                      | CHE       |
| <b>59. Hill et al., J Ultrasound Med. 2016</b>           | <u>Study type:</u> Retrospective<br><u>Population:</u> To determine its [sludge] natural history and potential future complications in this setting, we reviewed the imaging and clinical histories of nonhospitalized patients with a diagnosis of sludge on sonography                           | 2011 – 2014 | 104                      | 48 (13 – 87)            | 46           | 104                      | NM                                | 0       | US                            | AST, ALT                      | a. Crystal-based                                                    | NM              | b. Layers in the dependent portion of the gallbladder<br>c. No acoustic shadowing<br>d. Echogenic, mobile debris<br>f. Localisation: GB | NM        |
| <b>60. Wilcox et al., Am J Gastroenterol. 2016</b>       | <u>Study type:</u> Prospective<br><u>Population:</u> We prospectively evaluated patients with idiopathic pancreatitis over a 10-year period, and clinical information for each episode was reviewed                                                                                                | 2003 – 2013 | 201                      | 53 (17 – 95)            | 106          | NM                       | 20                                | 0       | US, EUS, CT, MRCP, ERCP       | AST, ALT, AP, Bilirubin, GGTP | b. Small stones<br>c. Echogenic material without acoustic shadowing | < 3             | b. Layers in the dependent portion of the gallbladder<br>c. No acoustic shadowing<br>d. Bright echoes<br>f. Localisation: NM            | ERCP, CHE |
| <b>61. Stevens et al., J Gastrointest Surg. 2016</b>     | <u>Study type:</u> Retrospective<br><u>Population:</u> The aim of this study was to examine the value of prophylactic cholecystectomy following an episode of acute pancreatitis in patients with no history of alcohol abuse and no stones found on ultrasound.                                   | 2005 – 2015 | 195                      | 54 (15 – 93)            | 95           | 14                       | NM                                | 0       | US, MRCP                      | AST, ALT                      | b. Small stones                                                     | < 3             | a. Suspension of cholesterol monohydrate crystals or calcium bilirubinate granules<br>f. Localisation: NM                               | CHE       |

| Study                                                 | Study type/Population                                                                                                                                                                                                                                      | Date        | Total number of patients | Age (mean/ range or SD) | Sex (female) | No. of patients (Sludge)                                         | No. of patients (Microolithiasis)                                | Control | Diagnostics        | Lab values                     | Microoliths (Definition)                                                          | Microolith (mm) | Sludge (Definition)                                                                                                                                            | Treatment |
|-------------------------------------------------------|------------------------------------------------------------------------------------------------------------------------------------------------------------------------------------------------------------------------------------------------------------|-------------|--------------------------|-------------------------|--------------|------------------------------------------------------------------|------------------------------------------------------------------|---------|--------------------|--------------------------------|-----------------------------------------------------------------------------------|-----------------|----------------------------------------------------------------------------------------------------------------------------------------------------------------|-----------|
| 62. Kim et al., Radiology. 2017                       | <b>Study type:</b> Retrospective<br><b>Population:</b> To evaluate the prevalence of tumefactive sludge of the gallbladder detected at US and to assess whether any clinical and imaging differences exist between benign and malignant tumefactive sludge | 2001 – 2015 | 107                      | 60 (19 – 86)            | 48           | 107                                                              | NM                                                               | 0       | US                 | NM                             | c.Hyperechoic spots                                                               | NM              | a.Non-movable mass-like lesion + absence of internal vascularity<br>c. No acoustic shadowing<br>f.Localisation: NM                                             | NM        |
| 63. Su et al., Transplant Proc. 2018                  | <b>Study type:</b> Retrospective<br><b>Population:</b> We retrospectively investigated post-surgical donor gallbladder complications in clinical LDLT with gallbladder preservation                                                                        | 2013 – 2015 | 91                       | 31 (20 – 49)            | 31           | 9                                                                | 0                                                                | 0       | US                 | NM                             | NM                                                                                | NM              | b.Layers in the dependent portion of the gallbladder<br>c.Low amplitude echoes (no acoustic shadowing)<br>f.Localisation: GB                                   | NM        |
| 64. Serra et al., J Ultrasound. 2018                  | <b>Study type:</b> Retrospective<br><b>Population:</b> The primary objective of this study is to assess the reliability of CEUS in the diagnosis of sludge; the secondary objective is to assess the ability of CEUS to diagnose cancer.                   | 2013 – 2015 | 43                       | 54 (+/- 12)             | 26           | 16                                                               | 0                                                                | 23      | US (CEUS)          | NM                             | NM                                                                                | NM              | b.Layers in the dependent portion of the gallbladder<br>c.Low amplitude echoes (no acoustic shadowing)<br>f.Localisation: GB                                   | NM        |
| 65. Lopes et al., Clin Res Hepatol Gastroenterol 2019 | <b>Study type:</b> Prospective<br><b>Population:</b> This study investigated the role of linear EUS for identification of possible causes for acute pancreatitis when other investigative methods failed                                                   | 2012 – 2017 | 35                       | 52 (+/- 17.8)           | 25           | 2                                                                | 8                                                                | 0       | US, EUS            | NM                             | b. Small stones (no acoustic shadowing)                                           | < 5             | b.Layers in the dependent portion of the gallbladder<br>c. No acoustic shadowing<br>d. Suspension of echogenic material<br>f.Localisation: GB + CBD            | ERCP, CHE |
| 66. Idowu et al., J Ultrasound. 2018                  | <b>Study type:</b> Cross-sectional<br><b>Population:</b> Gallbladder diseases in pregnancy; US findings in an indigenous African population                                                                                                                | 2015-2016   | 656                      | 31                      | 655/656      | 2                                                                | NM                                                               | No      | US                 | NM                             | NM                                                                                | NM              | b.Layers in the dependent portion of the gallbladder<br>c.Low amplitude echoes (no acoustic shadowing)<br>f. Localisation: GB                                  | NM        |
| 67. Mitra et al., Indian J Gastroenterol. 2021        | <b>Study type:</b> Prospective<br><b>Population:</b> IAP patients underwent MRCP and EUS at least 4 weeks after an attack of AP                                                                                                                            | 2018 – 2019 | 31                       | 41 (40 – 49)            | 17           | 9 *<br>gallbladder (GB) Micro-lithiasis/GB sludge/cholelithiasis | 9 *<br>gallbladder (GB) Micro-lithiasis/GB sludge/cholelithiasis | 0       | MRCP, EUS          | NM                             | c. Hyperechoic focus with or without acoustic shadow                              | < 3             | a/d. Suspension of crystals + Hyperechoic material +<br>b.Layers in the dependent portion of the gallbladder<br>c. No acoustic shadowing<br>f.Localisation: GB | NM        |
| 68. Montenegro et al., Gastroenterol Hepatol. 2021    | <b>Study type:</b> Retrospective<br><b>Population:</b> Evaluate the role of EUS in the diagnosis of minilithiasis/biliary sludge in patients with digestive symptoms of probable biliary origin by resolving the symptoms after CHE                        | 2014 – 2018 | 50                       | 49 (+/- 2.3)            | 41           | 50<br>*microolithiasis/ biliary sludge                           | 50<br>*microolithiasis/ biliary sludge                           | 0       | US, EUS, CT, MRCP, | AST, ALT, AP, Bilirubin, GGTP, | b.Small stones                                                                    | < 3             | a.Crystals, Isoechoic and/or hyperechoic focus<br>c. No acoustic shadowing<br>f.Localisation: GB + CBD                                                         | NM        |
| 69. Quispel et al., Endosc Int Open. 2021             | <b>Study type:</b> Prospective<br><b>Population:</b> To establish the agreement among endosonographers regarding: 1. presence of common bile duct (CBD) stones, microolithiasis and sludge; and 2. the need for subsequent treatment                       | 2021****    | Video-fragments          | NM                      | NM           | NM                                                               | NM                                                               | NM      | EUS                | NM                             | c. Hyperechoic circumscribed bile duct content with or without acoustic shadowing | < 3             | c. No acoustic shadowing<br>d. Echoic, cloud shaped and mobile bile duct content<br>f.Localisation: GB + CBD                                                   | ERCP      |

**2.1.1 Overview of fulfilled inclusion criteria / study**

| Inclusion criteria met | Number of studies (Research Paper Dataset) |
|------------------------|--------------------------------------------|
| 5/5                    | 8/69 (11.6 %)                              |
| 4/5                    | 23/69 (33.3 %)                             |
| 3/5                    | 32/69 (46.3 %)                             |
| 2/5                    | 6/69 (8.7 %)                               |



## 2.2 Review Paper Dataset Summary (No Quality Assessment)

### Microlithiasis Legend (Review Paper):

- a. Crystal-based
- b. Small stones/calculi
- c. Precipitates  
Viscous precipitate containing mucin, cholesterol and calcium bilirubinate
- d. Hyperecho spots with „comet sign”

### Biliary Sludge Legend (Review + Research Articles)

- a. Fluid substance / Fluid-fluid interface / Fluid-fluid level / Calculi / Sediment / Cholesterol monohydrate crystals mixed with bilirubin granules / Calcium bilirubinate granules or cholesterol crystals / Suspension of crystals (usually cholesterol monohydrate) / Multiple nonshadowing calculi, pus, cholesterol crystals / Filling defects or obstruction of the bile ducts with a pluglike appearance / Filling defect in cholangiogram / Non-movable mass-like lesion + absence of internal vascularity / A mixture of particulate matter and bile that occurs when various solutes in bile precipitate / Viscous precipitate containing mucin, cholesterol and calcium bilirubinate
- b. Layers in the dependent portion of the gallbladder
- c. Low amplitude echoes (No acoustic shadowing/with or without shadowing)
- d. Hyperechoic mobile images (no acoustic shadowing) / Hyperechoic specks of calcification  
Hyperechoic aggregates / Slightly hyperechoic material  
Higher echo levels lesions / Echogenic Lesion / Echogenic foci / Echogenic material  
Isoechoic shadow / Presence of echoes in gallbladder (no acoustic shadowing)  
Echogenic, mobile debris / Echogenic material inside the gallbladder / Echogenic or flecks of brightly echogenic material / Mobile echoes / Echogenic material / Homogeneous echoes or heterogeneous echoes
- e. Size (Yes/No)  
2 to 5 mm  
< 2 mm
- f. Localisation mentioned? Yes/No  
Localisation: GB / Localisation: GB + CBD / Localisation: CBD / Localisation: NM

| Study                                                            | Study type / Topic                                                                                                               | Year | Total number of patients | Age (mean/ range or SD) | Sex (f/m) | No. of patients (Sludge) | No. of patients (Microolithiasis) | Control | Diagnostics              | Lab values                         | Microoliths (Definition)          | Microoliths (mm) | Sludge (Definition)                                                                                                                                                                                                                                                               |
|------------------------------------------------------------------|----------------------------------------------------------------------------------------------------------------------------------|------|--------------------------|-------------------------|-----------|--------------------------|-----------------------------------|---------|--------------------------|------------------------------------|-----------------------------------|------------------|-----------------------------------------------------------------------------------------------------------------------------------------------------------------------------------------------------------------------------------------------------------------------------------|
| 1. Angelico et al., <i>J Clin Gastroenterol.</i> 1990            | Review<br><u>Topic:</u><br>Biliary Sludge – a critical update                                                                    | 1990 | NM                       | NM                      | NM        | NM                       | NM                                | NM      | US, Bile microscopy      | NM                                 | NM                                | NM               | b.Layers in the dependent portion of the gallbladder<br>c.Low amplitude echoes (no acoustic shadowing)<br>f.Localisation: GB + CBD                                                                                                                                                |
| 2. Ko et al., <i>Ann Intern Med</i> 1999                         | Review<br><u>Topic:</u><br>This paper proposes a protocol for the microscopic diagnosis of sludge                                | 1999 | NM                       | NM                      | NM        | NM                       | NM                                | NM      | Bile microscopy US, EUS  | NM                                 | NM                                | NM               | a.A mixture of particulate matter and bile that occurs when various solutes in bile precipitate<br>b.Layers in the dependent portion of the gallbladder<br>c.Low amplitude echoes (no acoustic shadowing)<br>f.Localisation: GB + CBD                                             |
| 3. Shaffer et al., <i>Dig Liver Dis.</i> 2003                    | Review<br><u>Topic:</u><br>A calculous biliary pain: new concepts for an old entity                                              | 2003 | NM                       | NM                      | NM        | NM                       | NM                                | NM      | US, EUS                  | NM                                 | a.Crystal-based                   | < 3              | NM                                                                                                                                                                                                                                                                                |
| 4. Ko et al., <i>Best Pract Res Clin Gastroenterol.</i> 2003     | Review<br><u>Topic:</u><br>Gastrointestinal disorders of the critically ill. Biliary sludge and cholecystitis                    | 2003 | NM                       | NM                      | NM        | NM                       | NM                                | NM      | US                       | NM                                 | c.Precipitates                    | NM               | b.Layers in the dependent portion of the gallbladder<br>c.Low amplitude echoes (no acoustic shadowing)<br>g.Localisation: GB + CBD                                                                                                                                                |
| 5. Jain et al., <i>Curr Treat Options Gastroenterol.</i> 2004    | Review<br><u>Topic:</u><br>Biliary Sludge: When Should It Not be Ignored?                                                        | 2004 | NM                       | NM                      | NM        | NM                       | NM                                | NM      | US, EUS, Bile microscopy | NM                                 | b.Small stones                    | < 3              | b.Layers in the dependent portion of the gallbladder<br>c.Low amplitude echoes (no acoustic shadowing)<br>f.Localisation: GB + CBD                                                                                                                                                |
| 6. Wilcox et al., <i>Gastrointest Endosc.</i> 2006               | Review<br><u>Topic:</u><br>Role of endoscopic evaluation in idiopathic pancreatitis                                              | 2006 | NM                       | NM                      | NM        | NM                       | NM                                | NM      | US, EUS, ERCP            | NM (Only in context of CBD stones) | b.Small stones                    | < 3              | a. Suspension of crystals (usually cholesterol monohydrate), mucin, glycoproteins, cellular debris, and proteinaceous material within bile.<br>f.Localisation: GB + CBD                                                                                                           |
| 7. Jünger et al., <i>Best Pract Res Clin Gastroenterol.</i> 2006 | Review<br><u>Topic:</u><br>Gallstone disease: Microolithiasis and Sludge                                                         | 2006 | NM                       | NM                      | NM        | NM                       | NM                                | NM      | US, EUS, Bile microscopy | NM                                 | NM                                | NM               | a. Suspension of precipitated "particulate matter" in bile dispersed in a viscous, mucin-rich liquid phase<br>f.Localisation: GB + CBD                                                                                                                                            |
| 8. Mbongo-Kama et al., <i>Ann Hepatol.</i> 2007                  | Review<br><u>Topic:</u><br>MDR3 mutations associated with intrahepatic and gallbladder cholesterol cholelithiasis                | 2007 | NM                       | NM                      | NM        | NM                       | NM                                | NM      | US, bile microscopy      | NM                                 | b. Small stones                   | <2               | a. cholesterol monohydrate crystals constitute first sediment macroscopically visible (sludge)<br>f.Localisation: GB + CBD                                                                                                                                                        |
| 9. Alexakis et al., <i>Pancreatol.</i> 2007                      | Review<br><u>Topic:</u><br>When is pancreatitis considered to be of biliary origin and what are the implications for management? | 2007 | NM                       | NM                      | NM        | NM                       | NM                                | NM      | US, EUS, MRCP,           | AST, ALT, Bilirubin                | a.Crystal-based<br>b.Small stones | 1 – 9            | a.A mixture of particulate matter which precipitates from bile, can consist variously of cellular, proteinaceous and bacterial debris and may also contain cholesterol monohydrate crystals, calcium bilirubinate and other calcium salts embedded in mucin<br>f.Localisation: GB |

| Study                                                      | Study type / Topic                                                                                              | Year | Total number of patients | Age (mean/ range or SD) | Sex (f/m) | No. of patients (Sludge) | No. of patients (Microoliths) | Control | Diagnostics                              | Lab values          | Microoliths (Definition)                                                      | Microolith (mm) | Sludge (Definition)                                                                                                                                                                               |
|------------------------------------------------------------|-----------------------------------------------------------------------------------------------------------------|------|--------------------------|-------------------------|-----------|--------------------------|-------------------------------|---------|------------------------------------------|---------------------|-------------------------------------------------------------------------------|-----------------|---------------------------------------------------------------------------------------------------------------------------------------------------------------------------------------------------|
| 10. Canlas et al. World J Gastroenterol. 2007              | Review<br>Topic: Role of endoscopic retrograde cholangiopancreatography in acute pancreatitis                   | 2007 | NM                       | NM                      | NM        | NM                       | NM                            | NM      | EUS, ERCP, Bile microscopy               | AST, ALT, Bilirubin | c. viscous precipitate containing mucin, cholesterol and calcium bilirubinate | NM              | a. viscous precipitate containing mucin, cholesterol and calcium bilirubinate which can obstruct the pancreatic duct<br>f. Localisation: GB + CBD                                                 |
| 11. Elta et al., World J Gastroenterol. 2008               | Review<br>Topic: Sphincter of Oddi dysfunction and bile duct microolithiasis in acute idiopathic pancreatitis   | 2008 | NM                       | NM                      | NM        | NM                       | NM                            | NM      | US, EUS, ERCP, MRCP, Other               | NM                  | b. Small stones                                                               | 1-2             | a. Collection of crystals (seen only by microscopic exam), glycoproteins, protein, cellular debris and mucin.<br>f. Localisation: GB                                                              |
| 12. Godfrey et al. Postgrad Med J. 2010                    | Review<br>Topic: Endoscopic ultrasound: a review of current diagnostic and therapeutic applications             | 2010 | NM                       | NM                      | NM        | NM                       | NM                            | NM      | EUS                                      | NM                  | b. Small calculi                                                              | <3              | NM                                                                                                                                                                                                |
| 13. van Geenen et al. Nat Rev Gastroenterol Hepatol. 2010  | Review<br>Topic: Etiology and diagnosis of acute biliary pancreatitis                                           | 2010 | NM                       | NM                      | NM        | NM                       | NM                            | NM      | EUS, MRCP                                | ALT, AP, Bilirubin  | b. Small stones                                                               | 2-5             | a. Calculi<br>f. Localisation: GB + CBD                                                                                                                                                           |
| 14. Buxbaum et al. Gastroenterol Clin North Am. 2012       | Review<br>Topic: The role of endoscopic retrograde cholangiopancreatography in patients with pancreatic disease | 2012 | NM                       | NM                      | NM        | NM                       | NM                            | NM      | Microscopy, ERCP                         | NM                  | b. Small stones                                                               | <3              | a. Suspension of cellular debris and biliary crystals<br>f. Localisation: GB + CBD                                                                                                                |
| 15. Stinton et al. Gut Liver. 2012                         | Review<br>Topic: Epidemiology of gallbladder disease: cholelithiasis and cancer.                                | 2012 | NM                       | NM                      | NM        | NM                       | NM                            | NM      | NM                                       | NM                  | b. Small stones                                                               | <1              | NM                                                                                                                                                                                                |
| 16. Testoni et al., World J Gastroenterol. 2014            | Review<br>Topic: Acute recurrent pancreatitis: Etiopathogenesis, diagnosis and treatment                        | 2014 | NM                       | NM                      | NM        | NM                       | NM                            | NM      | US, CT, EUS, MRCP, ERCP, Bile microscopy | NM                  | b. Small stones                                                               | < 2             | NM                                                                                                                                                                                                |
| 17. Şurlin et al., World J Gastroenterol. 2014             | Review<br>Topic: Imaging tests for accurate diagnosis of acute biliary pancreatitis                             | 2014 | NM                       | NM                      | NM        | NM                       | NM                            | NM      | US, CT, EUS, MRCP, ERCP, Bile microscopy | NM                  | a. Crystal-based                                                              | NM              | NM                                                                                                                                                                                                |
| 18. Smith et al., Am J Med Sci. 2015                       | Review<br>Topic: Emerging Role of Endoscopic Ultrasound in the Diagnostic Evaluation of Idiopathic Pancreatitis | 2015 | NM                       | NM                      | NM        | NM                       | NM                            | NM      | US, CT, EUS, MRCP, ERCP, Bile microscopy | NM                  | b. Small stones                                                               | < 3             | NM                                                                                                                                                                                                |
| 19. Macías-Gómez et al., World J Gastrointest Endosc. 2015 | Review<br>Topic: Endoscopic management of biliary complications after liver transplantation                     | 2015 | NM                       | NM                      | NM        | NM                       | NM                            | NM      | NM                                       | NM                  | b. Small stones                                                               | <5              | a. Thick collection of mucus, calcium bicarbonate and cholesterol crystals<br>f. Localisation: GB + CBD                                                                                           |
| 20. Wang et al., Eur J Clin Invest. 2017                   | Review<br>Topic: cholecystokinin secretion, a link between celiac disease and cholesterol gallstone disease     | 2017 | NM                       | NM                      | NM        | NM                       | NM                            | NM      | US                                       | NM                  | NM                                                                            | NM              | a. Precursor of gallstones that consists of solid cholesterol monohydrate crystals, calcium bilirubinate granules, or other calcium salts embedded in strands of mucin gel<br>f. Localisation: GB |

| Study                                                               | Study type / Topic                                                                                                                                          | Year | Total number of patients | Age (mean/ range or SD) | Sex (f/m) | No. of patients (Sludge) | No. of patients (Microlithiasis) | Control | Diagnostics                               | Lab values   | Microliths (Definition)              | Microlith (mm) | Sludge (Definition)                                                                                                                                                                                                                                     |
|---------------------------------------------------------------------|-------------------------------------------------------------------------------------------------------------------------------------------------------------|------|--------------------------|-------------------------|-----------|--------------------------|----------------------------------|---------|-------------------------------------------|--------------|--------------------------------------|----------------|---------------------------------------------------------------------------------------------------------------------------------------------------------------------------------------------------------------------------------------------------------|
| <b>21. Jagannath et al., Curr Treat Options Gastroenterol. 2018</b> | Review<br>Topic: Recurrent Acute Pancreatitis: Current Concepts in the Diagnosis and Management                                                             | 2018 | NM                       | NM                      | NM        | NM                       | NM                               | NM      | US, CT, EUS, MRCP, ERCP, Bile microscopy  | NM           | b.Small stones                       | < 3            | b.Layers in the dependent portion of the gallbladder<br>c.Low amplitude echoes (no acoustic shadowing)<br>f.Localisation: GB                                                                                                                            |
| <b>22. Wang et al., Liver Res. 2018</b>                             | Review<br>Topic: Similarities and differences between biliary sludge and microlithiasis: Their clinical and patho-physiological significances               | 2018 | NM                       | NM                      | NM        | NM                       | NM                               | NM      | US, CT, EUS, MRCP, ERPCP, Bile microscopy | Bilirubin    | b.Small stones                       | < 3            | a.Amorphous mixture of particulate matter and bile, which occurs when various solutes in bile precipitate.<br>b.Layers in the dependent portion of the gallbladder<br>c. Echogenic (no acoustic shadowing)<br>f.Localisation: GB + CBD                  |
| <b>23. Wan et al., Gastrointest Endosc. 2018</b>                    | Review<br>Topic: Comparison of EUS with magnetic resonance cholangiopancreatography in idiopathic acute pancreatitis: a systematic review and meta-analysis | 2018 | NM                       | NM                      | NM        | NM                       | NM                               | NM      | US, CT, EUS, MRCP, ERCP                   | NM           | b.Small stones                       | < 5            | NM                                                                                                                                                                                                                                                      |
| <b>24. Pereira et al., J Gastrointest Surg. 2019</b>                | Review<br>Topic: Endoscopic Ultrasound for Routine Assessment in Idiopathic Acute Pancreatitis                                                              | 2019 | 1850                     | NM                      | NM        | NM                       | NM                               | NM      | EUS Bile microscopy                       | NM           | b.small stones                       | <3             | a.Collection of crystals seen only by microscopic exam<br>f.Localisation: GB + CBD                                                                                                                                                                      |
| <b>25. Del Vecchio et al., Clin J Gastroenterol. 2019</b>           | Review<br>Topic: Idiopathic acute pancreatitis: a review on etiology and diagnostic work-up                                                                 | 2019 | NM                       | NM                      | NM        | NM                       | NM                               | NM      | US, CT, EUS, MRCP, ERCP                   | AST, ALT, AP | NM                                   | NM             | a. Cholesterol monohydrate crystals, calcium bilirubinate granules, calcium carbonate salts or small gallstones (<2 mm)<br>b.Layers in the dependent portion of the gallbladder<br>c.Low amplitude echoes (no acoustic shadowing)<br>f.Localisation: GB |
| <b>26. Boraschi et al., World J Gastroenterol. 2021</b>             | Review<br>Topic: Abdominal and gastrointestinal manifestations in COVID-19 patients                                                                         | 2021 | NM                       | NM                      | NM        | NM                       | NM                               | NM      | US, CT                                    | NM           | d. Hyperecho spots with „comet sign” | NM             | a.Sediment<br>b.Layers in the dependent portion of the gallbladder<br>f. Localisation: GB                                                                                                                                                               |

Regarding the natural occurrence of sludge and microlithiasis in gallbladder and/or common bile duct, the articles mentioning an anatomic structure by name were scored as "yes" and then further subdivided into GB, CBD or GB + CBD. In the case of a highly suggestive formulation, such as that sludge and microlithiasis could be detected by bile microscopy, this was taken as evidence of a correlate in gallbladder and common bile duct.

\*NM: not mentioned in the article

\*\*\*Year of publication (or duration of the recruitment period, if indicated)

The mean age has been rounded up from 0.5 and down below

### 3. Data collection

The following parameters were collected for all studies included: Study type (prospective/retrospective/RCT) and study population investigated, study period (alternatively the year of publication if the study period was not clearly stated), journal of publication, number of study participants included (+ mean age, gender distribution), number of patients with evidence of sludge and/or microlithiasis, number of control patients (in most cases, no control groups were specifically matched to patients with sludge or microlithiasis detection due to thematic study heterogeneity), diagnostic and laboratory tools used, definitions of biliary sludge and/or microlithiasis used, and if mentioned, which therapeutic consequences were in case of detection. Due to a large number of sludge/microlithiasis definitions used, coding was carried out using defined signal words for ease of statistical quantification (see Figures 3 and 4). No attempt was made to obtain undisclosed data by contacting the corresponding authors, but missing data were marked "NM (not mentioned)". An overview of the included studies can be found in Figure 1. The entire data set of the studies examined is given in the supplement.

### 4. Quality assessment

The quality of the included studies and the risk of bias were assessed by two independent investigators (S.S. and M.Z.) using the QUADAS-2 score, adjusted to the predefined inclusion criteria. One problem in the tool application was that the sludge/microlithiasis characteristics formulated as inclusion criteria or a uniform definition design was not set as study endpoints in most articles, but a definition of the two entities was usually presented as already predefined in the context of the diagnostic work-up (for example, in the context of the search for causes in idiopathic acute pancreatitis). The sole consideration of biliary sludge and/or biliary microlithiasis definition(s) across all studies was thereby rated as equally good or poor in the absence of a universally applicable definition (in the corresponding QUADAS 2 categories 2) index test, 3) reference standard and 4) flow and timing). Regarding patient selection, the risk of bias was assessed depending on whether pre-diagnosed sludge patients were examined in the respective study or whether it was unclear at the beginning whether sludge/microlithiasis would be detectable. It was also assessed whether a (sludge/microlithiasis-specific) control group was examined. The applicability of the respective studies was assessed following the exact criteria to overcome the lack of uniform definitions and the resulting (currently still too large) scope for interpretation (for more information see supplement No.5 and 6).

## 5. Risk of bias assessment

### **5.1 Domain 1: Patient Selection**

#### Risk of Bias:

Could the Selection of Patients Have Introduced Bias?

#### Survey-Manuscript:

It was assessed whether already sludge-diagnosed patients were examined or whether it was not clear at the beginning of the study whether sludge was present. It was also assessed whether a control group was examined (e.g. sonographically a group of patients with sludge detection and a group without sludge detection).

#### Applicability:

The assessment of the study's applicability was standardised on the basis of the predefined inclusion criteria. Therefore, all studies (since by definition the inclusion criteria were met) are colour-coded with the same colour.

### **5.2 Domain 2: Index Text**

#### Risk of Bias:

Could the Conduct or Interpretation of the Index Test Have Introduced Bias?

#### Survey-Manuscript:

As no globally universal sludge/microlithiasis definition is currently used, all studies (that met the inclusion criteria) were colour-coded.

#### Applicability:

Since the diagnosis of sludge/microlithiasis, especially in ultrasound-based procedures, is currently still subject to (too) great variability (ultrasound device, experience, interpretation of findings), all studies were assessed uniformly in terms of colour ("equally good" or "equally bad").

### **5.3 Domain 3: Reference Standard**

#### Risk of Bias:

Could the Reference Standard, Its Conduct, or Its Interpretation Have Introduced Bias?

#### Survey-Manuscript:

Potential for bias is related to the potential influence of previous knowledge on the interpretation of the reference standard. Since in our case no predefined standard is used for ultrasound or endosonography, there is no bias due

to prior knowledge of a reference value. Of course, this absence itself creates an enormous room for interpretation. All studies were therefore given a uniform colour rating ("equally good" or "equally bad").

#### Applicability:

Are There Concerns That the Target Condition as Defined by the Reference Standard Does Not Match the Question?

Without a reference standard there can be no different interpretations of a possible threshold. For example, in the (endo-)sonographic diagnosis of microlithiasis, a acoustic shadow is mentioned as a characteristic, but whether this acoustic shadow should still be considered differentiated with regard to different intensity strengths is omitted. All studies were therefore given a uniform colour rating ("equally good" or "equally bad").

### **5.4 Domain 4: Flow and Timing**

#### Risk of Bias:

Could the Patient Flow Have Introduced Bias?

#### Survey-Manuscript:

The time interval between index test and reference standard to be investigated for this is omitted due to the lack of (universally) defined index test and reference standard modalities.

### **5.5 Quadas 2 Tool**

#### Categories:

Low/High/Unclear

#### *Risk of Bias*

#### *Applicability*

| Study                                       | Patient Selection | Index Test | Reference Standard | Flow and Timing |  | Patient Selection | Index Test | Reference Standard |
|---------------------------------------------|-------------------|------------|--------------------|-----------------|--|-------------------|------------|--------------------|
| Allen et al.,<br>Am J Surg. 1981            | Yellow            | Green      | Red                | Green           |  | Green             | Green      | Red                |
| Lee et al.,<br>Gastroenterology.<br>1986    | Yellow            | Green      | Red                | Green           |  | Green             | Green      | Red                |
| Lee et al.,<br>Gastroenterology.<br>1988    | Yellow            | Green      | Red                | Green           |  | Green             | Green      | Red                |
| Ohara et al., J Clin<br>Gastroenterol. 1990 | Yellow            | Green      | Red                | Green           |  | Green             | Green      | Red                |
| Ros et al.,<br>Gastroenterology.<br>1991    | Green             | Green      | Red                | Green           |  | Green             | Green      | Red                |

|                                                           |  |  |  |  |  |  |
|-----------------------------------------------------------|--|--|--|--|--|--|
| Buscaill et al.,<br>Dig Dis Sci. 1992                     |  |  |  |  |  |  |
| Delchier et al.,<br>Hepatology 1986                       |  |  |  |  |  |  |
| Lee et al.,<br>New England<br>Journal of Medicine<br>1992 |  |  |  |  |  |  |
| Murray et al.,<br>Gut 1992                                |  |  |  |  |  |  |
| Maringhini et al.,<br>Ann Intern Med.<br>1993             |  |  |  |  |  |  |
| Toursarkissian et al.,<br>South Med J 1995                |  |  |  |  |  |  |
| Barton et al.,<br>AJR Am J<br>Roentgenol 1995             |  |  |  |  |  |  |
| Barton et al.,<br>AJR Am J<br>Roentgenol 1995             |  |  |  |  |  |  |
| Dill et al.,<br>Endoscopy 1995                            |  |  |  |  |  |  |
| Marotta et al.,<br>Can J Gastroenterol                    |  |  |  |  |  |  |
| Tandon et al,<br>Gut 1997                                 |  |  |  |  |  |  |
| Sharma et al.,<br>Gastroenterology<br>1997                |  |  |  |  |  |  |
| Ko et al., Review<br>Ann Intern Med<br>1999               |  |  |  |  |  |  |
| Grau et al.,<br>Int J Pancreatol.<br>1999                 |  |  |  |  |  |  |
| Frossard et al.,<br>Am J Med. 2000                        |  |  |  |  |  |  |
| Materne et al.,<br>Endoscopy 2000                         |  |  |  |  |  |  |
| Petroni et al.,                                           |  |  |  |  |  |  |



|                                                |        |       |     |       |       |       |     |
|------------------------------------------------|--------|-------|-----|-------|-------|-------|-----|
| Eur J Gastroenterol Hepatol 2000               | Yellow | Green | Red | Green | White | Green | Red |
| Méndez-Sánchez et al. J Nutr. 2001             | Green  | Green | Red | Green | White | Green | Red |
| Tandon et al., Am J Gastro 2001                | Yellow | Green | Red | Green | White | Green | Red |
| Calvo et al., J Clin Gastroenterol. 2002       | Green  | Green | Red | Green | White | Green | Red |
| Kohut et al., World J Gastroenterol. 2002      | Green  | Green | Red | Green | White | Green | Red |
| Kubota et al., J Gastroenterol Hepatol. 2002   | Yellow | Green | Red | Green | White | Green | Red |
| 38. Calvo et al. J Clin Gastroenterol. 2002    | Yellow | Green | Red | Green | White | Green | Red |
| Ierardi et al., Aliment Pharmacol Ther. 2003   | Yellow | Green | Red | Green | White | Green | Red |
| Rashdan et al., Gastrointest Endosc. 2003      | Yellow | Green | Red | Green | White | Green | Red |
| Saraswat et al., J Gastroenterol Hepatol. 2004 | Green  | Green | Red | Green | White | Green | Red |
| Ponce et al. Eur J Nucl Med Mol Imaging. 2004  | Green  | Green | Red | Green | White | Green | Red |
| Ko et al., Hepatology 2005                     | Green  | Green | Red | Green | White | Green | Red |
| Mirbargheri et al., J Gastrointest Surg. 2005  | Green  | Green | Red | Green | White | Green | Red |
| Ko et al., Clin Gastroenterol Hepatol. 2005    | Yellow | Green | Red | Green | White | Green | Red |
| Rocca et al., Gastrointest Endosc. 2006        | Yellow | Green | Red | Green | White | Green | Red |
| Wilcox et al., Gastrointest Endosc. 2006       | Green  | Green | Red | Green | White | Green | Red |

|                                                              |  |  |  |  |  |  |
|--------------------------------------------------------------|--|--|--|--|--|--|
| Bolukbas et al.,<br>J Gastroenterol<br>Hepatol. 2006         |  |  |  |  |  |  |
| Garg et al.,<br>Clin Gastroenterol<br>Hepatol. 2007          |  |  |  |  |  |  |
| Jüngst et al.,<br>Best Pract Res Clin<br>Gastroenterol. 2006 |  |  |  |  |  |  |
| Inoue et al.,<br>Ultrasound Med<br>Biol. 2007                |  |  |  |  |  |  |
| Numata et al.,<br>J Ultrasound Med.<br>2007                  |  |  |  |  |  |  |
| Alexakis et al.,<br>Pancreatology. 2007                      |  |  |  |  |  |  |
| Elta et al.,<br>World J<br>Gastroenterol. 2008               |  |  |  |  |  |  |
| Okoro et al.<br>Gastrointest Endosc.<br>2008                 |  |  |  |  |  |  |
| Bastouly et al.,<br>Obes Surg. 2009                          |  |  |  |  |  |  |
| Kim et al.,<br>Dig Dis Sci. 2010                             |  |  |  |  |  |  |
| Elmi et al.,<br>Dig Dis Sci. 2010                            |  |  |  |  |  |  |
| Mesotten et al.,<br>J Clin Endocrinol<br>Metab. 2009         |  |  |  |  |  |  |
| Baltas et al.,<br>Singapore Med J.<br>2009                   |  |  |  |  |  |  |
| Vila et al.,<br>Scand J<br>Gastroenterol. 2010               |  |  |  |  |  |  |
| Ardengh et al.,<br>Rev Assoc Med<br>Bras (1992). 2010        |  |  |  |  |  |  |
| Ortega et al.,<br>Pancreas 2011                              |  |  |  |  |  |  |

|                                                          |  |  |  |  |  |  |  |
|----------------------------------------------------------|--|--|--|--|--|--|--|
|                                                          |  |  |  |  |  |  |  |
| Endo et al.,<br>Dig Endosc. 2011                         |  |  |  |  |  |  |  |
| Zhan et al.,<br>J Gastroenterol<br>Hepatol. 2011         |  |  |  |  |  |  |  |
| Rana et al.,<br>Ann Gastroenterol.<br>2012               |  |  |  |  |  |  |  |
| Wang et al.<br>Digestion. 2012                           |  |  |  |  |  |  |  |
| Cheong et al.,<br>World J Gastrointest<br>Endosc 2013    |  |  |  |  |  |  |  |
| Wong et al.,<br>J Clin Gastroenterol.<br>2013            |  |  |  |  |  |  |  |
| Mathew et al.,<br>JPEN J Parenter<br>Enteral Nutr. 2015  |  |  |  |  |  |  |  |
| Neri et al.,<br>Clin Med Insights<br>Gastroenterol. 2014 |  |  |  |  |  |  |  |
| Kim et al.,<br>Dig Dis Sci. 2014                         |  |  |  |  |  |  |  |
| Chio et al.,<br>Ultrasonography.<br>2014                 |  |  |  |  |  |  |  |
| Anderloni et al.,<br>World J<br>Gastroenterol. 2015      |  |  |  |  |  |  |  |
| Räty et al.,<br>Ann Surg. 2015                           |  |  |  |  |  |  |  |
| Hill et al.,<br>J Ultrasound Med.<br>2016                |  |  |  |  |  |  |  |
| Wilcox et al.,<br>Am J Gastroenterol.<br>2016            |  |  |  |  |  |  |  |
| Stevens et al.,<br>J Gastrointest Surg.<br>2016          |  |  |  |  |  |  |  |

|                                                         |        |       |     |       |       |       |     |
|---------------------------------------------------------|--------|-------|-----|-------|-------|-------|-----|
| Kim et al.,<br>Radiology. 2017                          | Yellow | Green | Red | Green | White | Green | Red |
| Su et al.,<br>Transplant Proc.<br>2018                  | Yellow | Green | Red | Green | White | Green | Red |
| Serra et al.,<br>J Ultrasound. 2018                     | Yellow | Green | Red | Green | White | Green | Red |
| Lopes et al.,<br>Clin Res Hepatol<br>Gastroenterol 2019 | Yellow | Green | Red | Green | White | Green | Red |
| Idowu et al. J<br>Ultrasound. 2019.                     | Yellow | Green | Red | Green | White | Green | Red |
| Mitra et al.,<br>Indian J<br>Gastroenterol. 2021        | Yellow | Green | Red | Green | White | Green | Red |
| Montenegro et al.,<br>Gastroenterol<br>Hepatol. 2021    | Yellow | Green | Red | Green | White | Green | Red |
| Quispel et al.,<br>Endosc Int Open.<br>2021             | Green  | Green | Red | Green | White | Green | Red |

## 6. Studies excluded at full-text screening stage (with brief reasons)

- Farinon AM, Ricci GL, Sianesi M, Percudani M, Zanella E. Physiopathologic role of microlithiasis in gallstone pancreatitis. *Surg Gynecol Obstet.* 1987 Mar;164(3):252-6. PMID: 3824114  
Reason: no full text viewable
- Gafá M, Sarli L, Miselli A, Pietra N, Carreras F, Peracchia A. Sludge and microlithiasis of the biliary tract after total gastrectomy and postoperative total parenteral nutrition. *Surg Gynecol Obstet.* 1987 Nov;165(5):413-8. PMID: 3118486.  
Reason: no full text viewable
- Belghiti J, Kleinman P, Cherqui D, Perniceni T, Bernades P, Fékété F. Traitement précoce de la lithiase biliaire au cours des pancréatites biliaires [Early treatment of biliary lithiasis in biliary pancreatitis]. *Gastroenterol Clin Biol.* 1987 Nov;11(11):786-9. French. PMID: 3322925.  
Reason: no full text viewable
- Chen CL, Wang KL, Chuang JH, Lin JN, Chu MF, Chang CH. Biliary sludge-cast formation following liver transplantation. *Hepatogastroenterology.* 1988 Feb;35(1):22-4. PMID: 3283014.  
Reason: no full text viewable

5. Neoptolemos JP, Davidson BR, Winder AF, Vallance D. Role of duodenal bile crystal analysis in the investigation of 'idiopathic' pancreatitis. *Br J Surg*. 1988 May;75(5):450-3. doi: 10.1002/bjs.1800750517. PMID: 3390676  
Reason: No specific definition given / inclusion criteria not met
6. Sarli L, Gafa M, Bonilauri E, Longinotti E, Carreras F, Pietra N, Peracchia A. Pigment vs. cholesterol microlithiasis: comparison of clinical features, bacteriology, stone and gallbladder composition. *Hepatogastroenterology*. 1989 Jun;36(3):156-9. PMID: 2753462.  
Reason: no full text viewable
7. Sitzmann JV, Pitt HA, Steinborn PA, Pasha ZR, Sanders RC. Cholecystokinin prevents parenteral nutrition induced biliary sludge in humans. *Surg Gynecol Obstet*. 1990 Jan;170(1):25-31. PMID: 2104681.  
Reason: no full text viewable
8. Takahashi T, Yamamura T, Utsunomiya J. Pathogenesis of acute cholecystitis after gastrectomy. *Br J Surg*. 1990 May;77(5):536-9. doi: 10.1002/bjs.1800770522. PMID: 2354337.  
Reason: No specific definition given / inclusion criteria not met
9. O'Connor HJ, Vickers CR, Buckels JA, et al. Role of endoscopic retrograde cholangiopancreatography after orthotopic liver transplantation. *Gut*. 1991;32(4):419-423. doi:10.1136/gut.32.4.419  
Reason: No specific definition given / inclusion criteria not met
10. Ewins DL, Javaid A, Coskeran PB, Shah S, Butler J, Deprez PH, Miell J, Calam J, Barrett JJ, Dawson JM, et al. Assessment of gall bladder dynamics, cholecystokinin release and the development of gallstones during octreotide therapy for acromegaly. *Q J Med*. 1992 Apr;83(300):295-306. PMID: 1631261  
Reason: No specific definition given / inclusion criteria not met
11. Nakano K, Chijiwa K, Noshiro H, Hirota I, Yamasaki T. Human gallbladder bile becomes lithogenic during short-term intravenous hyperalimentation. *J Surg Res*. 1992 Oct;53(4):396-401. doi: 10.1016/0022-4804(92)90067-a. PMID: 1405620.  
Reason: No specific definition given / inclusion criteria not met
12. Traverso LW, Kozarek RA, Ball TJ, Brandabur JJ, Hunter JA, Jolly PC, Patterson DJ, Ryan JA, Thirlby RC, Wechter DG. Endoscopic retrograde cholangiopancreatography after laparoscopic cholecystectomy. *Am J Surg*. 1993 May;165(5):581-6. doi: 10.1016/s0002-9610(05)80439-8. PMID: 8488941.  
Reason: No specific definition given / inclusion criteria not met
13. [Therapeutic efficacy of ursodeoxycholic acid in persistent gallbladder lithiasis and persistent biliary sludge: preliminary results of a multicenter experience  
Reason: Spanish article
14. Lee SP, Hayashi A, Kim YS. Biliary sludge: curiosity or culprit? *Hepatology*. 1994 Aug;20(2):523-5. PMID: 8045512.  
Reason: Editorial
15. Pereira SP, Ellul JP, Keightley A, Kennedy C, Dick J, Dowling RH. Percutaneous cholecystolithotomy: risks, benefits, and long-term outcome. *Scand J Gastroenterol*. 1995 May;30(5):484-8. doi: 10.3109/00365529509093312. PMID: 7638577  
Reason: Only 1/5 inclusion criteria met

16. Sung JJ, Chung SC. Endoscopic stenting for palliation of malignant biliary obstruction. A review of progress in the last 15 years. *Dig Dis Sci*. 1995 Jun;40(6):1167-73. doi: 10.1007/BF02065519. PMID: 7540126  
Reason: No specific definition given / inclusion criteria not met
17. Ballinger AB, Barnes E, Alstead EM, Fairclough PD. Is intervention necessary after a first episode of acute idiopathic pancreatitis? *Gut*. 1996 Feb;38(2):293-5. doi: 10.1136/gut.38.2.293. PMID: 8801214; PMCID: PMC1383040.  
Reason: No specific definition given / inclusion criteria not met
18. Wilkinson LS, Levine TS, Smith D, Chadwick SJ. Biliary sludge: can ultrasound reliably detect the presence of crystals in bile? *Eur J Gastroenterol Hepatol*. 1996 Oct;8(10):999-1001. doi: 10.1097/00042737-199610000-00012. PMID: 8930566.  
Reason: No specific definition given / inclusion criteria not met
19. Testoni PA, Caporuscio S, Bagnolo F, Lella F. Idiopathic recurrent pancreatitis: long-term results after ERCP, endoscopic sphincterotomy, or ursodeoxycholic acid treatment. *Am J Gastroenterol*. 2000 Jul;95(7):1702-7. doi: 10.1111/j.1572-0241.2000.02292.x. PMID: 10925971.  
Reason: No specific definition given / inclusion criteria not met
20. Quallich LG, Stern MA, Rich M, Chey WD, Barnett JL, Elta GH. Bile duct crystals do not contribute to sphincter of Oddi dysfunction. *Gastrointest Endosc*. 2002 Feb;55(2):163-6. doi: 10.1067/mge.2002.121340. PMID: 11818916  
Reason: No specific definition given / inclusion criteria not met
21. Fracchia M, Pellegrino S, Secreto P, Gallo L, Masoero G, Pera A, Galatola G. Biliary lipid composition in cholesterol microlithiasis. *Gut*. 2001 May;48(5):702-6. doi: 10.1136/gut.48.5.702. PMID: 11302972; PMCID: PMC1728290.  
Reason: No specific definition given / inclusion criteria not met (CSI comparison only)
22. Kohut M, Nowak A, Nowakowska-Duława E, Kaczor R, Marek T. The frequency of bile duct crystals in patients with presumed biliary pancreatitis. *Gastrointest Endosc*. 2001 Jul;54(1):37-41. doi: 10.1067/mge.2001.115475. PMID: 11427839  
Reason: No specific definition given / inclusion criteria not met
23. Quallich LG, Stern MA, Rich M, Chey WD, Barnett JL, Elta GH. Bile duct crystals do not contribute to sphincter of Oddi dysfunction. *Gastrointest Endosc*. 2002 Feb;55(2):163-6. doi: 10.1067/mge.2002.121340. PMID: 11818916  
Reason: No specific definition given / inclusion criteria not met
24. Jacobson BC, Waxman I, Parmar K, Kauffman JM, Clarke GA, Van Dam J. Endoscopic ultrasound-guided gallbladder bile aspiration in idiopathic pancreatitis carries a significant risk of bile peritonitis. *Pancreatol*. 2002;2(1):26-9. doi: 10.1159/000049444. PMID: 12120002.  
Reason: No specific definition given / inclusion criteria not met
25. Ammori BJ, Boreham B, Lewis P, Roberts SA. The biochemical detection of biliary etiology of acute pancreatitis on admission: a revisit in the modern era of biliary imaging. *Pancreas*. 2003 Mar;26(2):e32-5. doi: 10.1097/00006676-200303000-00023. PMID: 12604925  
Reason: No specific definition given / inclusion criteria not met

26. Gloor B, Stahel PF, Müller CA, Worni M, Büchler MW, Uhl W. Incidence and management of biliary pancreatitis in cholecystectomized patients. Results of a 7-year study. *J Gastrointest Surg.* 2003 Mar-Apr;7(3):372-7. doi: 10.1016/s1091-255x(02)00418-3. PMID: 12654562.  
Reason: No specific definition given / inclusion criteria not met
27. Parry SD, Muiesan P. Cholangiopathy and the biliary cast syndrome. *Eur J Gastroenterol Hepatol.* 2003 Apr;15(4):341-3. doi: 10.1097/00042737-200304000-00001. PMID: 12655251.  
Reason: No specific definition given / inclusion criteria not met (Reference to other publication)
28. Rosmorduc O, Hermelin B, Boelle PY, Parc R, Taboury J, Poupon R. ABCB4 gene mutation-associated cholelithiasis in adults. *Gastroenterology.* 2003 Aug;125(2):452-9. doi: 10.1016/s0016-5085(03)00898-9. PMID: 12891548.  
Reason: No specific definition given / inclusion criteria not met
29. Venneman NG, van Brummelen SE, van Berge-Henegouwen GP, van Erpecum KJ. Microlithiasis: an important cause of "idiopathic" acute pancreatitis? *Ann Hepatol.* 2003 Jan-Mar;2(1):30-5. PMID: 15094703.  
Reason: no full text viewable
30. Portincasa P, Moschetta A, Berardino M, Di-Ciaula A, Vacca M, Baldassarre G, Pietrapertosa A, Cammarota R, Tannoia N, Palasciano G. Impaired gallbladder motility and delayed orocecal transit contribute to pigment gallstone and biliary sludge formation in beta-thalassemia major adults. *World J Gastroenterol.* 2004 Aug 15;10(16):2383-90. doi: 10.3748/wjg.v10.i16.2383. PMID: 15285024; PMCID: PMC4576293.
31. Reason: inclusion criteria not met
32. Dittrick G, Lamont JP, Kuhn JA, Mallat D. Usefulness of endoscopic ultrasound in patients at high risk of choledocholithiasis. *Proc (Bayl Univ Med Cent).* 2005 Jul;18(3):211-3. doi: 10.1080/08998280.2005.11928068. PMID: 16200174; PMCID: PMC1200726  
Reason: No specific definition given / inclusion criteria not met
33. Petrone MC, Arcidiacono PG, Testoni PA. Endoscopic ultrasonography for evaluating patients with recurrent pancreatitis. *World J Gastroenterol.* 2008 Feb 21;14(7):1016-22. doi: 10.3748/wjg.14.1016. PMID: 18286681; PMCID: PMC2689402  
Reason: No specific definition given / inclusion criteria not met
34. Artifon EL, Kumar A, Eloubeidi MA, Chu A, Halwan B, Sakai P, Bhutani MS. Prospective randomized trial of EUS versus ERCP-guided common bile duct stone removal: an interim report (with video). *Gastrointest Endosc.* 2009 Feb;69(2):238-43. doi: 10.1016/j.gie.2008.05.020. PMID: 19185687  
Reason: No specific definition given / inclusion criteria not met
35. Mariani A, Arcidiacono PG, Curioni S, Giussani A, Testoni PA. Diagnostic yield of ERCP and secretin-enhanced MRCP and EUS in patients with acute recurrent pancreatitis of unknown aetiology. *Dig Liver Dis.* 2009 Oct;41(10):753-8. doi: 10.1016/j.dld.2009.01.009. Epub 2009 Mar 10. PMID: 19278909.  
Reason: No specific definition given / inclusion criteria not met
36. Lotfi M, Keramati P, Assdsangabi R, Nabavizadeh SA, Karimi M. Ultrasonographic assessment of the prevalence of cholelithiasis and biliary sludge in beta-thalassemia patients in Iran. *Med Sci Monit.* 2009 Aug;15(8):CR398-402. PMID: 19644415.  
Reason: Paediatric study

37. Abeysuriya V, Deen KI, Navarathne NM. Biliary microlithiasis, sludge, crystals, microcrystallization, and usefulness of assessment of nucleation time. *Hepatobiliary Pancreat Dis Int*. 2010 Jun;9(3):248-53. PMID: 20525550.  
Reason: no full text viewable
38. Pecchi A, De Santis M, Di Benedetto F, Gibertini M, Gerunda G, Torricelli P. Role of magnetic resonance cholangiography in biliary complications of orthotopic liver transplantation. *Radiol Med*. 2010 Oct;115(7):1065-79. English, Italian. doi: 10.1007/s11547-010-0563-7. Epub 2010 Jul 31. PMID: 20680501.  
Reason: No specific definition given / inclusion criteria not met
39. Kotwal V, Talukdar R, Levy M, Vege SS. Role of endoscopic ultrasound during hospitalization for acute pancreatitis. *World J Gastroenterol*. 2010 Oct 21;16(39):4888-91. doi: 10.3748/wjg.v16.i39.4888. PMID: 20954274; PMCID: PMC2957596.  
Reason: No specific definition given / inclusion criteria not met
40. Poves E, del-Pozo D, Tabernero S, Bardina A, Martínez P, Castillo MC. Clinical impact of high-definition endoscopic ultrasonography (EUS) in a district hospital. *Rev Esp Enferm Dig*. 2010 Dec;102(12):698-703. doi: 10.4321/s1130-01082010001200004. PMID: 21198311  
Reason: No specific definition given / inclusion criteria not met
41. Jones HG, Jardine N, Williamson J, Puntis MC, Morris-Stiff GJ. Patients with non-diagnostic hyperamylasaemia must be investigated and managed as per acute pancreatitis. *JRSM Short Rep*. 2012 Jan;3(1):7. doi: 10.1258/shorts.2011.011118. Epub 2012 Jan 24. PMID: 22299073; PMCID: PMC3269105.  
Reason: No specific definition given / inclusion criteria not met
42. Wang SY, Tang HM, Chen GQ, Xu JM, Zhong L, Wang ZW, Deng GL, Xing TH, Lu LG, Peng ZH. Effect of ursodeoxycholic acid administration after liver transplantation on serum liver tests and biliary complications: a randomized clinical trial. *Digestion*. 2012;86(3):208-17. doi: 10.1159/000339711. Epub 2012 Aug 29. PMID: 22948036.  
Reason: No specific definition given / inclusion criteria not met
43. Zheng SG, Xu HX, Liu LN, Lu MD, Xie XY, Wang WP, Hu B, Yan K, Ding H, Tang SS, Qian LX, Luo BM. Contrast-enhanced ultrasound versus conventional ultrasound in the diagnosis of polypoid lesion of gallbladder: a multi-center study of dynamic microvascularization. *Clin Hemorheol Microcirc*. 2013;55(3):359-74. doi: 10.3233/CH-121651. PMID: 23283444.  
Reason: No specific definition given / inclusion criteria not met
44. Kedia S, Dhingra R, Garg PK. Recurrent acute pancreatitis: an approach to diagnosis and management. *Trop Gastroenterol*. 2013 Jul-Sep;34(3):123-35. doi: 10.7869/tg.116. PMID: 24851521.  
Reason: no full text viewable
45. Chantarojanasiri T, Hirooka Y, Kawashima H, Ohno E, Kongkam P, Goto H. The role of endoscopic ultrasound in the diagnosis of gallbladder diseases. *J Med Ultrason* (2001). 2017 Jan;44(1):63-70. doi: 10.1007/s10396-016-0742-9. Epub 2016 Sep 12. PMID: 27619811.  
Reason: No specific definition given / inclusion criteria not met
46. Somani P, Sunkara T, Sharma M. Role of endoscopic ultrasound in idiopathic pancreatitis. *World J Gastroenterol*. 2017 Oct 14;23(38):6952-6961. doi: 10.3748/wjg.v23.i38.6952. PMID: 29097868; PMCID: PMC5658313.



- Reason: No specific definition given / inclusion criteria not met
47. Değerli V, Korkmaz T, Mollamehmetoğlu H, Ertan C. The importance of routine bedside biliary ultrasonography in the management of patients admitted to the emergency department with isolated acute epigastric pain. *Turk J Med Sci*. 2017 Aug 23;47(4):1137-1143. doi: 10.3906/sag-1603-12. PMID: 29156853.  
Reason: No specific definition given / inclusion criteria not met
48. Sharma M, Somani P, Sunkara T. Imaging of gall bladder by endoscopic ultrasound. *World J Gastrointest Endosc*. 2018 Jan 16;10(1):10-15. doi: 10.4253/wjge.v10.i1.10. PMID: 29375736; PMCID: PMC5768998.  
Reason: No specific definition given / inclusion criteria not met
49. Lee HS, Chung MJ, Park JY, Bang S, Park SW, Song SY, Chung JB. Urgent endoscopic retrograde cholangiopancreatography is not superior to early ERCP in acute biliary pancreatitis with biliary obstruction without cholangitis. *PLoS One*. 2018 Feb 5;13(2):e0190835. doi: 10.1371/journal.pone.0190835. PMID: 29401491; PMCID: PMC5798765.  
Reason: No specific definition given / inclusion criteria not met
50. Okuno N, Hara K, Mizuno N, Kuwahara T, Iwaya H, Ito A, Kuraoka N, Matsumoto S, Polmanee P, Niwa Y. Efficacy of the 6-mm fully covered self-expandable metal stent during endoscopic ultrasound-guided hepaticogastrostomy as a primary biliary drainage for the cases estimated difficult endoscopic retrograde cholangiopancreatography: A prospective clinical study. *J Gastroenterol Hepatol*. 2018 Jul;33(7):1413-1421. doi: 10.1111/jgh.14112. Epub 2018 Mar 30. PMID: 29424011.  
Reason: No specific definition given / inclusion criteria not met
51. Bencini L, Marchet A, Alfieri S, Rosa F, Verlato G, Marrelli D, Roviello F, Pacelli F, Cristadoro L, Taddei A, Farsi M; Italian Research Group for Gastric Cancer (GIRCG). The Cholegas trial: long-term results of prophylactic cholecystectomy during gastrectomy for cancer-a randomized-controlled trial. *Gastric Cancer*. 2019 May;22(3):632-639. doi: 10.1007/s10120-018-0879-x. Epub 2018 Sep 22. PMID: 30244294.  
Reason: No specific definition given / inclusion criteria not met
52. Sitaraman LM, Sachdev AH, Gonda TA, Sethi A, Poneros JM, Gress FG. The Utility of Endoscopic Ultrasound in Patients with Isolated Elevations in Serum Amylase and/or Lipase. *Clin Endosc*. 2019 Mar;52(2):175-181. doi: 10.5946/ce.2018.110. Epub 2019 Jan 16. PMID: 30646674; PMCID: PMC6453845.  
Reason: No specific definition given / inclusion criteria not met
53. Miyamoto T, Ebihara T, Kozaki K. The association between eating difficulties and biliary sludge in the gallbladder in older adults with advanced dementia, at end of life. *PLoS One*. 2019 Jul 16;14(7):e0219538. doi: 10.1371/journal.pone.0219538. PMID: 31310644; PMCID: PMC6634396. Reason: No specific definition given / inclusion criteria not met
54. Kim YJ, Chung WC, Jo IH, Kim J, Kim S. Efficacy of endoscopic ultrasound after removal of common bile duct stone. *Scand J Gastroenterol*. 2019 Sep;54(9):1160-1165. doi: 10.1080/00365521.2019.1660911. Epub 2019 Sep 6. PMID: 31491357.  
Reason: No specific definition given / inclusion criteria not met
55. Wang HH, Portincasa P, Liu M, Tso P, Wang DQ. An Update on the Lithogenic Mechanisms of Cholecystokinin a Receptor (CCKAR), an Important Gallstone Gene for Lith13. *Genes (Basel)*. 2020 Nov 29;11(12):1438. doi: 10.3390/genes11121438. PMID: 33260332; PMCID: PMC7761502  
Reason: No specific definition given / inclusion criteria not met

56. Shil BC, Banik RK, Saha M, Saifullah AM, Uddin MR, Rashid MM, Mahbub I, Saha SK, Chowdhury M. Pancreatobiliary Diseases: Evaluation by Transabdominal and Endoscopic Ultrasound. *Mymensingh Med J*. 2021 Apr;30(2):458-465. PMID: 33830129.

Reason: no full text viewable

## 7. Expert Survey

Besides questions on definition and treatment strategies in the case of sludge and microlithiasis detection a total of 7 case vignettes based on extracted original patient cases (including the first laboratory report from the time of presentation in the central emergency department; slightly modified to protect anonymity) were to be answered, each with a diagnostic and a therapeutic assessment. The patient case vignettes were anonymised and modified in relation to the age stated in the vignette in such a way that it is not possible to trace them back to the individual patient case. The expert selection was based on clinical and scientific merits, scientific expertise through publications in endoscopy/endosonography, or many years/decades of clinical endoscopy experience with clinical and/or scientific visibility. The contact and sending of the participation link was done by mail. We used the LimeSurvey administration interface to create the survey (LimeSurvey version 4.4.12+210308). The created survey was first evaluated in an internal validation round at the Department of Medicine II (LMU University Hospital Munich) before being sent to the expert group. Experts who did not respond to the invitation email, were sent two reminders. The response to the survey was anonymous. The data protection officer of LMU University Hospital Munich approved the survey. The complete survey was available only for invited experts on a protected LMU University Hospital Munich server. Outcomes of the expert survey were presented and discussed at the European Pancreas Congress in Verona, which took place online on June 11th, 2021 during the “Biliary Pancreatitis” panel session. An online voting poll was conducted involving the session participants (Supplement Table 2). The results of the EPC online voting were initially evaluated internally by the author team in conjunction with the results of the systemic literature review. A final definition of the terms: biliary sludge/biliary microlithiasis was agreed upon in a second expert survey round, in which the EUS expert panel was able to evaluate the definition proposals delineated from the literature review, EUS expert panel round 1 and EPC online voting session using a voting link. For the second round of expert voting, we made the results of our literature review available to the experts

| Expert profile              |                            | Response | Response rate |
|-----------------------------|----------------------------|----------|---------------|
| <b>Speciality</b>           | Gastroenterology           | 27 / 29  | 93.1 %        |
|                             | No information             | 2 / 29   | 6.9 %         |
| <b>Years of experience</b>  | 10 - 20 years              | 8 / 29   | 27.6 %        |
|                             | 20 - 30 years              | 10 / 29  | 34.5 %        |
|                             | > 30 years                 | 9 / 29   | 31.0 %        |
|                             | No information             | 2 / 29   | 6.9 %         |
| <b>Performing Endoscopy</b> | Yes                        | 26 / 29  | 89.7 %        |
|                             | No                         | 2 / 29   | 6.9 %         |
|                             | No information             | 1 / 29   | 3.4 %         |
| <b>EUS experience</b>       | Not performing             | 5 / 29   | 17.2 %        |
|                             | < 50 procedures / year     | 2 / 29   | 6.9 %         |
|                             | 50 - 100 procedures / year | 2 / 29   | 6.9 %         |
|                             | > 100 procedures / year    | 18 / 29  | 62.1 %        |
|                             | No information             | 2 / 29   | 6.9 %         |
| <b>Type of practice</b>     | Private practice           | 1 / 29   | 3.4 %         |
|                             | Academic teaching hospital | 26 / 29  | 89.7 %        |
|                             | No information             | 2 / 29   | 6.9 %         |
| <b>Continent</b>            | Europe                     | 21 / 29  | 72.4 %        |
|                             | North-America              | 4 / 29   | 13.8 %        |
|                             | Asia                       | 1 / 29   | 3.4 %         |
|                             | Africa                     | 1 / 29   | 3.4 %         |
|                             | No information             | 2 / 29   | 6.9 %         |

**Supplement Table 1.** The LMU Microlithiasis Survey Expert Consortium.

30 world-renowned experts in the field of endosonography-assisted diagnosis and therapy were contacted, of whom 25 (83.3 %) returned the survey questionnaire in full. 65.5 % of the experts had more than 20 years, 31.0 % even more than 30 years of professional experience. The highly relevant field of endosonography in biliary sludge/microlithiasis diagnostics was excellently covered by 62.1 % of the experts with more than 100 procedures per year. The majority of the experts surveyed are employed at university hospitals (89.7 %) in European centres (72.4 %).

---

# Microlithiasis Expert-Survey

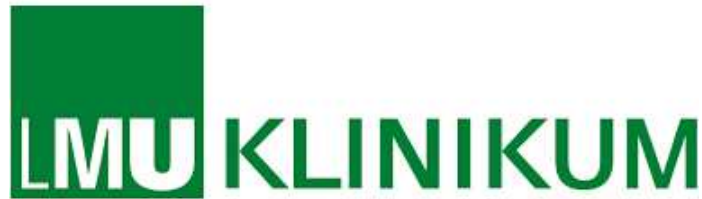

In clinical practice and literature, there are many definitions of biliary sludge / microlithiasis. This situation is confusing and makes it difficult to compare different studies concerning the clinical manifestations of biliary sludge or microlithiasis (e.g. pancreatitis, upper-abdominal pain, cholestasis).

Analysis of reports published in the last ten years (2010-2020) shows that there is a significant lack of inter-author agreement concerning:

- I. Diagnostic imaging differences/similarities between biliary sludge and microlithiasis
- II. Clinical manifestations of sludge or microlithiasis concerning its localization (gallbladder, bile ducts)
- III. Size cut-off values and imaging features of microliths

Moreover, in nearly **30% of published papers, the terms microlithiasis and biliary sludge are used as synonyms.**

The current study aims to:

- Identify **controversies** in the definition of biliary sludge/microlithiasis, involving recommendations for clinical practice
- Establish an **expert-based survey** on the definition and diagnostic (as well as therapeutic) strategy of biliary sludge/microlithiasis
- Perform a **global survey** among gastroenterologists, surgeons, and endoscopists, which will help to coin a **new, worldwide and clear definition** of this frequent disease and determine what would help research evidence-based therapeutic strategies in the future.

There are 36 questions in this survey.

Next

---

## Responder data.

(This question is mandatory)

### **Data usage note**

Your data will be treated confidentially by us within the offered WEB application framework and will be used exclusively to answer the questions formulated in the introduction to the survey.

Your data will be adequately protected against third parties' access and processed following the provisions of the German Data Protection Act (DSGVO). This information will not be passed on or transmitted to unauthorized third parties. Your data will be deleted at the latest three months after processing for your data's intended purpose or forwarding to the responsible office.

You can revoke your authorization for the purpose-related processing of your data at any time in writing without giving reasons. Your stored data will then be deleted immediately following legal regulations.

The processing of your data within the smartphone application's scope (remote device) is carried out via encrypted access and is only permitted for your data.

"I am aware, and I am informed that my data can be disclosed to third parties on the Internet and can be viewed by anyone without protection!"

### **Datenverwendungshinweis**

Ihre persönlichen Daten werden von uns im Rahmen der angebotenen WEB-Applikation vertraulich behandelt und ausschließlich dazu verwendet, um die in der Einleitung des Surveys formulierten Fragestellungen zu beantworten.

Ihre Angaben werden vor dem Zugriff Dritter angemessen geschützt und nach den Bestimmungen der Datenschutzgrundverordnung (DSGVO) verarbeitet. Eine Weitergabe oder Übermittlung dieser Angaben an nicht berechnigte Dritte erfolgt nicht. Ihre Daten werden spätestens 3 Monate nach zweckgebundener Verarbeitung bzw. Weiterleitung Ihrer Angaben an die zuständige Stelle gelöscht.

Sie können Ihre Genehmigung zur zweckgebundenen Verarbeitung Ihrer Daten jederzeit ohne Angabe von Gründen schriftlich widerrufen. Ihre gespeicherten Daten werden dann unverzüglich im Rahmen gesetzlicher Vorschriften gelöscht.

Die Verarbeitung Ihrer personenbezogenen Daten im Rahmen der Smartphone-Applikation (Private Device) erfolgt über verschlüsselte Zugänge und ist Ihnen nur für Ihre eigenen Daten gestattet.

„Mir ist bewusst und ich bin darüber informiert, dass damit meine persönlichen Daten im Internet gegenüber Dritten offenbart werden können und ggfs. ungeschützt für Jedermann einsehbar sind!“

Choose one of the following answers

- I declare my consent to this / Ich erkläre mich damit einverstanden.

Summary years of experience in medicine:

Choose one of the following answers

- <5 years
- 5-10 years
- 10-20 years
- 20-30 years
- >30 years

What is your specialty:

Choose one of the following answers

- Gastroenterology
- Surgery
- Internal Medicine
- Pediatrics
- Other
- 

Are you performing endoscopy?

Choose one of the following answers

- Yes
- No

EUS experience:





## Clinical cases

### CASE 1

**30 – 40 year old patient, diagnosed in ER – severe abdominal pain, no chronic diseases , no trauma, no alcoholic history, ECOG 0.**

|                          |                        |         |   |             |       |
|--------------------------|------------------------|---------|---|-------------|-------|
| <input type="checkbox"/> | Natrium                | mmol/l  | S | 135 - 145   | 139   |
| <input type="checkbox"/> | Kalium                 | mmol/l  | S | 3,5 - 5,1   | 4,1   |
| <input type="checkbox"/> | Osmolalität            | mosm/kg | S | 280 - 300   | M 291 |
| <input type="checkbox"/> | Glucose                | mg/dl   | S | 60 - 99     | 107   |
| <input type="checkbox"/> | Harnstoff              | mg/dl   | S | 17 - 49     | 22    |
| <input type="checkbox"/> | Kreatinin (Jaffé)      | mg/dl   | S | 0,5 - 1,0   | 0,8   |
| <input type="checkbox"/> | GFR (CKD-EPI)          | ml/min  | S | >= 90       | 99    |
| <input type="checkbox"/> | Harnsäure              | mg/dl   | S | 2,3 - 6,1   | 3,9   |
| <input type="checkbox"/> | Calcium                | mmol/l  | S | 2,05 - 2,65 | 2,29  |
| <input type="checkbox"/> | Calcium (Alb.-korr.)   | mmol/l  | S | 2,05 - 2,65 | 2,27  |
| <input type="checkbox"/> | Calcium (Eiw.-korr.)   | mmol/l  | S | 2,05 - 2,65 | 2,35  |
| <input type="checkbox"/> | Magnesium              | mmol/l  | S | 0,66 - 1,07 | 0,74  |
| <input type="checkbox"/> | Anorg. Phosphat        | mg/dl   | S | 2,5 - 4,8   | 2,8   |
| <input type="checkbox"/> | CRP                    | mg/dl   | S | <= 0,5      | 0,7   |
| <input type="checkbox"/> | Procalcitonin          | ng/ml   | S | <= 0,1      | < 0,1 |
| <input type="checkbox"/> | Eiweiß, gesamt         | g/dl    | S | 6,4 - 8,4   | 6,8   |
| <input type="checkbox"/> | Albumin                | g/dl    | S | 3,5 - 5,2   | 4,1   |
| <input type="checkbox"/> | Bilirubin, gesamt      | mg/dl   | S | <= 1,2      | 3,5   |
| <input type="checkbox"/> | GOT [AST]              | U/l     | S | <= 34       | 84    |
| <input type="checkbox"/> | GPT [ALT]              | U/l     | S | <= 34       | 230   |
| <input type="checkbox"/> | Gamma-GT (37°)         | U/l     | S | <= 39       | 265   |
| <input type="checkbox"/> | Alkalische Phosphatase | U/l     | S | 35 - 105    | 234   |
| <input type="checkbox"/> | Alpha-Amylase          | U/l     | S | <= 109      | 2056  |
| <input type="checkbox"/> | Lipase                 | U/l     | S | 13 - 60     | >7000 |
| <input type="checkbox"/> | LDH (37°)              | U/l     | S | <= 249      | 217   |

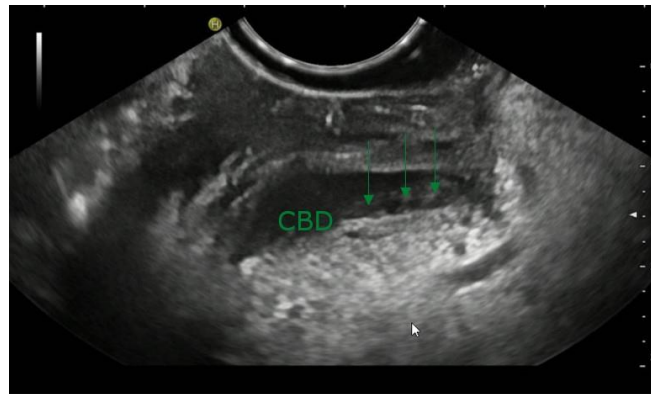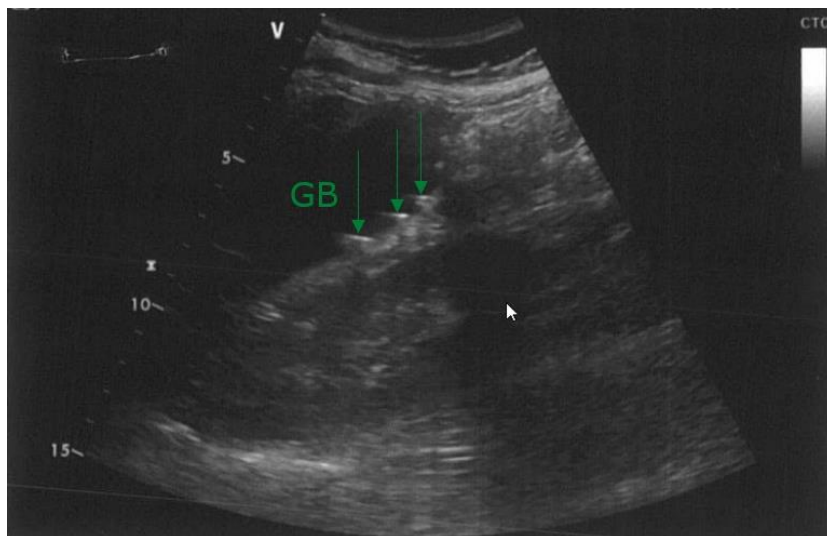

Picture 1 - Biochemical results. (all results and following images come from Klinikum LMU, Munich; Harnstoff - Urea, Harnsaure - Uric acid, Eiweiß gesamt - Total protein, Freies Kupfer - Free copper, Eisen - Iron)

Picture 2 - Linear endoscopic ultrasound, focus on the common bile duct (CBD), arrows are pointed at the area of interest.

Picture 3 - Transabdominal ultrasound examination, focus on the gallbladder, arrows are pointed at the area of interest.

**QUESTION 1:** How do you phrase the depicted finding in your report:

Choose one of the following answers

- Biliary Sludge (both GB and CBD)
- Biliary Microlithiasis (both GB and CBD)
- Biliary Sludge (GB) and Microlithiasis (CBD)
- Biliary Microlithiasis (GB) and Sludge (CBD)
- Gallstone(s) (both GB and CBD)

**QUESTION 2:** What would be your FIRST CHOICE of treatment:

Choose one of the following answers

- Cholecystectomy (preferably laparoscopic)
- ERCP, with sphincterotomy
- Non-invasive (UDCA treatment)
- All of above options are equally of use
- Other therapy option

## CASE 2

60-70 year old patient, with accidentally detected dilatation of CBD in US (11mm), no focal lesions found on CT, no history of biliary-type pain in the past, no signs of gallstones, no pancreatitis in the past, ECOG 0.

| Klinische Chemie         |                           |          |    |               |       |
|--------------------------|---------------------------|----------|----|---------------|-------|
| <input type="checkbox"/> | Natrium                   | mmol/l   | S  | 135 - 145     | 143   |
| <input type="checkbox"/> | Kalium                    | mmol/l   | S  | 3,5 - 5,1     | 3,8   |
| <input type="checkbox"/> | Kreatinin (Jaffé)         | mg/dl    | S  | 0,5 - 1,0     | 0,3   |
| <input type="checkbox"/> | GFR (CKD-EPI)             | ml/min   | S  | >= 90         | 113   |
| <input type="checkbox"/> | CRP                       | mg/dl    | S  | <= 0,5        | 2,3   |
| <input type="checkbox"/> | Billirubin, gesamt        | mg/dl    | S  | <= 1,2        | 2     |
| <input type="checkbox"/> | GOT [AST]                 | U/l      | S  | <= 34         | 53    |
| <input type="checkbox"/> | GPT [ALT]                 | U/l      | S  | <= 34         | 68    |
| <input type="checkbox"/> | Gamma-GT (37°)            | U/l      | S  | <= 39         | 110   |
| Hämatologie              |                           |          |    |               |       |
| Kleines Blutbild         |                           |          |    |               |       |
| <input type="checkbox"/> | Leukozyten                | G/l      | EB | 4,00 - 10,40  | 13,4  |
| <input type="checkbox"/> | Erythrozyten              | T/l      | EB | 3,96 - 5,16   | 4,59  |
| <input type="checkbox"/> | Hämoglobin                | g/dl     | EB | 11,5 - 15,4   | 13,3  |
| <input type="checkbox"/> | Hämatokrit                | l/l      | EB | 0,346 - 0,453 | 0,412 |
| <input type="checkbox"/> | MCV                       | fl       | EB | 80,0 - 95,5   | 89,8  |
| <input type="checkbox"/> | MCH                       | pg       | EB | 26,1 - 32,6   | 29,0  |
| <input type="checkbox"/> | MCHC                      | g/dl     | EB | 31,9 - 35,5   | 32,3  |
| <input type="checkbox"/> | Thrombozyten              | G/l      | EB | 176 - 391     | 381   |
| <input type="checkbox"/> | Normoblasten (maschinell) | /100 Leu | EB | <= 1,0        | < 0,1 |
| <input type="checkbox"/> | RDW-CV #                  | %        | EB | 12,1 - 14,8   | 14,1  |
| <input type="checkbox"/> | PDW #                     | fl       | EB | 10 - 15       | 10    |
| <input type="checkbox"/> | MPV #                     | fl       | EB | 9,2 - 12,5    | 9,4   |

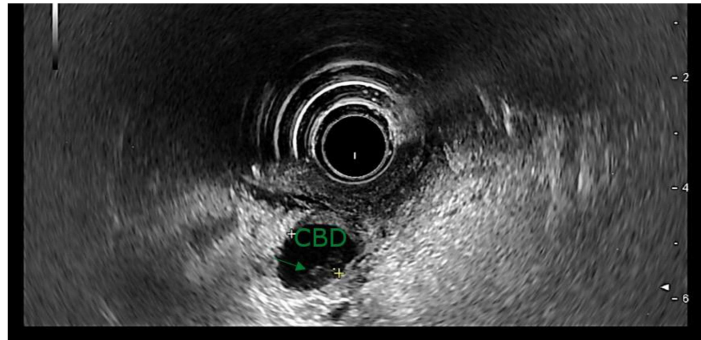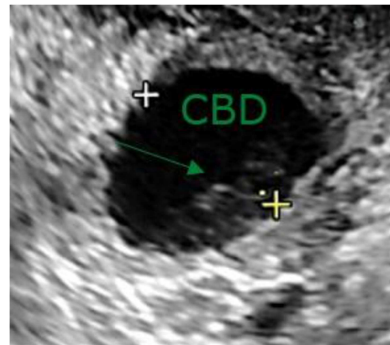

Picture 1 - Biochemical results. (all results and following images come from Klinikum LMU, Munich; Harnstoff - Urea, Harnsaure - Uric acid, Eiweiß gesamt - Total protein, Freies Kupfer - Free copper, Eisen - Iron)

Picture 2 - Radial endoscopic ultrasound examination. Focus on the common bile duct (CBD), the arrow is pointed at the area of interest.

Picture 3 - Magnification of radial endoscopic ultrasound image. Focus on the common bile duct (CBD), the arrow is pointed at the area of interest.

**QUESTION 1:** How do you phrase the depicted finding in your report:

Choose one of the following answers

- Biliary Sludge
- Biliary Microlithiasis
- Biliary Sludge and Microlithiasis
- Gallstone(s)

**QUESTION 2:** What would be your FIRST CHOICE of treatment:

Choose one of the following answers

- Cholecystectomy (preferably laparoscopic)
- ERCP, with sphincterotomy
- Non-invasive (UDCA treatment)
- All of above options are equally of use
- Other therapy option

### CASE 3

**50-60 year old patient, with relapsing upper-right and middle quadrant abdominal pain, Sporadically vomiting, no history of pancreatitis, ECOG 0.**

|                          |                        |        |   |           |             |
|--------------------------|------------------------|--------|---|-----------|-------------|
| <input type="checkbox"/> | Natrium                | mmol/l | S | 135 - 145 | <b>139</b>  |
| <input type="checkbox"/> | Kalium                 | mmol/l | S | 3,5 - 5,1 | <b>4,2</b>  |
| <input type="checkbox"/> | Kreatinin (Jaffé)      | mg/dl  | S | 0,7 - 1,2 | <b>1,0</b>  |
| <input type="checkbox"/> | GFR (CKD-EPI)          | ml/min | S | >= 90     | <b>84</b>   |
| <input type="checkbox"/> | CRP                    | mg/dl  | S | <= 0,5    | <b>0,8</b>  |
| <input type="checkbox"/> | Bilirubin, gesamt      | mg/dl  | S | <= 1,2    | <b>6,2</b>  |
| <input type="checkbox"/> | GOT [AST]              | U/l    | S | <= 49     | <b>106</b>  |
| <input type="checkbox"/> | GPT [ALT]              | U/l    | S | <= 49     | <b>174</b>  |
| <input type="checkbox"/> | GLDH (37°)             | U/l    | S | <= 6,9    | <b>54,3</b> |
| <input type="checkbox"/> | Gamma-GT (37°)         | U/l    | S | <= 59     | <b>445</b>  |
| <input type="checkbox"/> | Alkalische Phosphatase | U/l    | S | 40 - 130  | <b>98</b>   |
| <input type="checkbox"/> | Alpha-Amylase          | U/l    | S | <= 109    | <b>94</b>   |
| <input type="checkbox"/> | Lipase                 | U/l    | S | 13 - 60   | <b>37</b>   |
| <input type="checkbox"/> | LDH (37°)              | U/l    | S | <= 249    | <b>200</b>  |

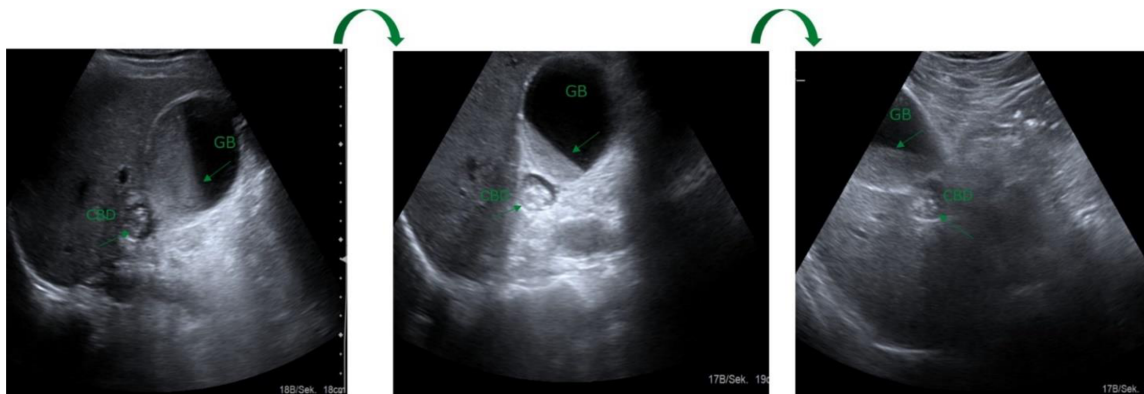

Picture 1 - Biochemical results. (all results and following images come from Klinikum LMU, Munich; Harnstoff - Urea, Harnsaure - Uric acid, Eiweiß gesamt - Total protein, Freies Kupfer - Free copper, Eisen - Iron)

Picture 2 - Abdominal ultrasound. Focus on the gallbladder (GB) and common bile duct (CBD). Pictures were taken after subsequent changes of probe and patients positions. Arrow point to the area of interest.

**QUESTION 1:** How do you phrase the depicted finding in your report:

Choose one of the following answers

- Biliary Sludge (both GB and CBD)
- Biliary Microlithiasis (both GB and CBD)
- Biliary Sludge (GB) and Microlithiasis (CBD)
- Biliary Microlithiasis (GB) and Sludge (CBD)
- Gallstone(s) (both GB and CBD)

**QUESTION 2:** What would be your FIRST CHOICE of treatment:

Choose one of the following answers

- Cholecystectomy (preferably laparoscopic)
- ERCP followed by cholecystectomy
- Non-invasive (UDCA treatment)
- All of above options are equally of use
- Other therapy option



## CASE 4

60-70 year old patient, with colic upper right quadrant abdominal pain, ECOG 0.

|                          |                        |        |   |              |      |     |
|--------------------------|------------------------|--------|---|--------------|------|-----|
| <input type="checkbox"/> | Natrium                | mmol/l | S | 135 - 145    | 144  | 138 |
| <input type="checkbox"/> | Kalium                 | mmol/l | S | 3,5 - 5,1    | 4,6  | 3,7 |
| <input type="checkbox"/> | Kalium                 | mmol/l | S | 3,5 - 5,0    |      |     |
| <input type="checkbox"/> | Glucose                | mg/dl  | S | 80 - 99      |      | 120 |
| <input type="checkbox"/> | Glucose S              | mg/dl  | S | 70 - 115     |      |     |
| <input type="checkbox"/> | Kreatinin (Jaffé)      | mg/dl  | S | 0,5 - 1,0    | 0,8  | 0,8 |
| <input type="checkbox"/> | GFR (CKD-EPI)          | ml/min | S | >= 90        | 91   | 91  |
| <input type="checkbox"/> | CRP                    | mg/dl  | S | <= 0,5       | 0,3  | 0,2 |
| <input type="checkbox"/> | Bilirubin, gesamt      | mg/dl  | S | <= 1,2       | 0,7  | 0,7 |
| <input type="checkbox"/> | GOT [AST]              | U/l    | S | <= 34        | 55   |     |
| <input type="checkbox"/> | GPT [ALT]              | U/l    | S | <= 34        | 58   | 49  |
| <input type="checkbox"/> | Cholinesterase         | kU/l   | S | 3,93 - 10,80 | 6,70 |     |
| <input type="checkbox"/> | Gamma-GT (37°)         | U/l    | S | <= 39        | 61   | 55  |
| <input type="checkbox"/> | Alkalische Phosphatase | U/l    | S | 35 - 105     | 69   | 82  |
| <input type="checkbox"/> | A-Amylase (25°)        | U/l    |   | <= 120       |      |     |
| <input type="checkbox"/> | Lipase                 | U/l    | S | 13 - 60      | 25   | 282 |
| <input type="checkbox"/> | LDH (37°)              | U/l    | S | <= 249       | 123  | 222 |
| <input type="checkbox"/> | Creatinkinase (CK)     | U/l    | S | <= 169       | 59   | 72  |

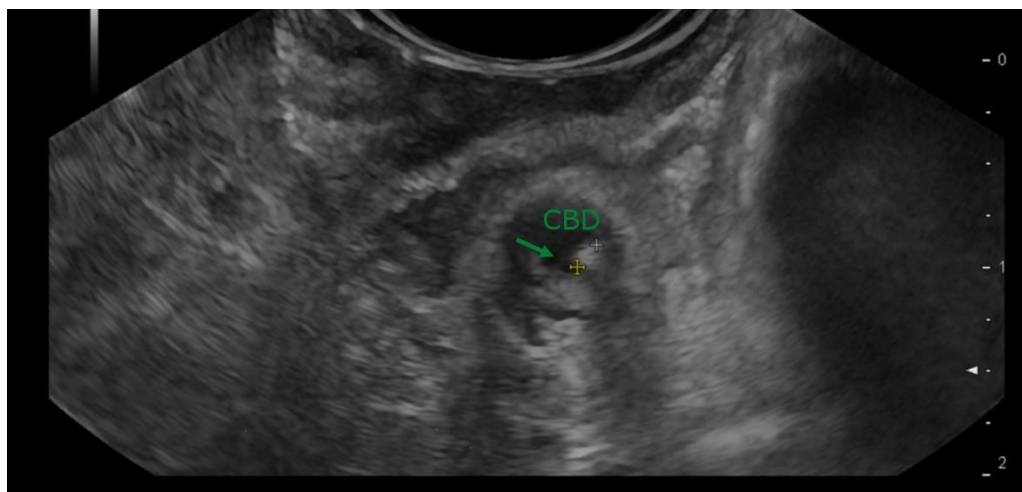

Picture 1 - Biochemical results. (all results and following images come from Klinikum LMU, Munich; Harnstoff - Urea, Harnsaure - Uric acid, Eiweiß gesamt - Total protein, Freies Kupfer - Free copper, Eisen - Iron)

Picture 2 - Linear endoscopic ultrasound. Focus on the common bile duct (CBD). Arrows are pointed at the area of interest.

**QUESTION 1:** How do you phrase the depicted finding in your report:

Choose one of the following answers

- Biliary Sludge
- Biliary Microlithiasis
- Biliary Sludge and Microlithiasis
- Gallstone(s)

**QUESTION 2:** What would be your FIRST CHOICE of treatment:

Choose one of the following answers

- Cholecystectomy (preferably laparoscopic)
- ERCP, with sphincterotomy
- Non-invasive (UDCA treatment)
- All of above options are equally of use
- Other therapy option

## CASE 5

40-50 year old patient, severe abdominal pain, no trauma, no history of alcohol abuse, no history of chronic diseases, ECOG 0.

|                          |                        |        |   |              |      |      |       |       |
|--------------------------|------------------------|--------|---|--------------|------|------|-------|-------|
| <input type="checkbox"/> | Natrium                | mmol/l | S | 135 - 145    | 137  | 137  | 141   | 138   |
| <input type="checkbox"/> | Kalium                 | mmol/l | S | 3,5 - 5,1    | 3,8  | 3,6  | 4,1   | 3,8   |
| <input type="checkbox"/> | Kalium                 | mmol/l | S | 3,5 - 5,0    |      |      |       |       |
| <input type="checkbox"/> | Glucose                | mg/dl  | S | 80 - 99      |      |      |       | 106   |
| <input type="checkbox"/> | Harnstoff              | mg/dl  | S | 17 - 49      |      | 14   |       | 20    |
| <input type="checkbox"/> | Kreatinin (Jaffé)      | mg/dl  | S | 0,5 - 1,0    | 0,7  | 0,7  | 0,9   | 0,8   |
| <input type="checkbox"/> | GFR (CKD-EPI)          | ml/min | S | >= 90        | 105  | 102  | 94    | 96    |
| <input type="checkbox"/> | Harnsäure              | mg/dl  | S | 2,3 - 6,1    |      |      |       |       |
| <input type="checkbox"/> | Calcium                | mmol/l | S | 2,05 - 2,65  |      |      |       |       |
| <input type="checkbox"/> | Calcium                | mmol/l | S | 2,20 - 2,55  |      | 2,26 |       | 2,35  |
| <input type="checkbox"/> | Calcium (Alb.-korr.)   | mmol/l | S | 2,20 - 2,55  |      | 2,23 |       |       |
| <input type="checkbox"/> | Magnesium              | mmol/l | S | 0,96 - 1,07  |      |      |       |       |
| <input type="checkbox"/> | Kupfer                 | µg/dl  | S | 88 - 201     |      |      |       |       |
| <input type="checkbox"/> | Freies Kupfer          | µg/dl  | S | <= 20        |      |      |       |       |
| <input type="checkbox"/> | Freies Kupfer          | %      | S | <= 10        |      |      |       |       |
| <input type="checkbox"/> | Eisen                  | µg/dl  | S | 60 - 180     |      |      |       |       |
| <input type="checkbox"/> | CRP                    | mg/dl  | S | <= 0,5       | 4,4  | 2,4  | 1,7   | 1,5   |
| <input type="checkbox"/> | Eiweiß, gesamt         | g/dl   | S | 6,4 - 8,4    |      |      |       |       |
| <input type="checkbox"/> | Eiweiß, gesamt         | g/dl   | S | 6,0 - 8,0    |      |      |       |       |
| <input type="checkbox"/> | Albumin                | g/dl   | S | 3,5 - 5,2    |      | 4,1  |       |       |
| <input type="checkbox"/> | Bilirubin, gesamt      | mg/dl  | S | <= 1,2       | 2,9  | 4,2  | 4,0   | 2,9   |
| <input type="checkbox"/> | Bilirubin, direkt      | mg/dl  | S | <= 0,2       | 1,4  |      |       |       |
| <input type="checkbox"/> | GOT [AST]              | U/l    | S | <= 34        |      | 387  | 604   |       |
| <input type="checkbox"/> | GPT [ALT]              | U/l    | S | <= 34        |      | 729  | 735   | 717   |
| <input type="checkbox"/> | GLDH (37°)             | U/l    | S | <= 4,9       |      |      |       |       |
| <input type="checkbox"/> | Cholinesterase         | kU/l   | S | 3,93 - 10,80 |      |      | 11,4  |       |
| <input type="checkbox"/> | Gamma-GT (37°)         | U/l    | S | <= 39        | 267  | 250  | 249   | 238   |
| <input type="checkbox"/> | Alkalische Phosphatase | U/l    | S | 35 - 105     | 232  | 212  | 194   | 171   |
| <input type="checkbox"/> | Alpha-Amylase          | U/l    | S | <= 109       |      |      |       |       |
| <input type="checkbox"/> | Lipase                 | U/l    | S | 13 - 60      | 1827 |      | >6000 | >6000 |

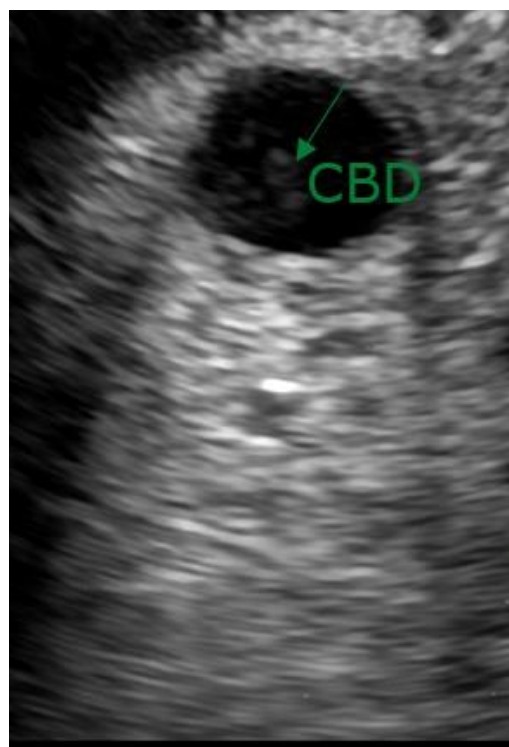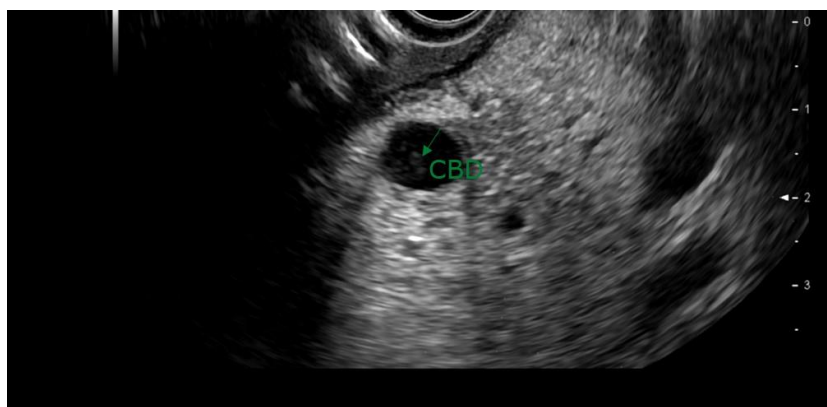

Picture 1 - Biochemical results. (all results and following images come from Klinikum LMU, Munich; Harnstoff - Urea, Harnsaure - Uric acid, Eiweiß gesamt - Total protein, Freies Kupfer - Free copper, Eisen - Iron)

Picture 2 - Linear endoscopic ultrasound. Focus on the common bile duct (CBD). Arrow is pointed at the area of interest.

Picture 3 - Magnification of linear endoscopic ultrasound image. Focus on the common bile duct (CBD), the arrow is pointed at the area of interest.



**QUESTION 1:** How do you phrase the depicted finding in your report:

Choose one of the following answers

- Biliary Sludge
- Biliary Microlithiasis
- Biliary Sludge and Microlithiasis
- Gallstone(s)

**QUESTION 2:** What would be your FIRST CHOICE of treatment:

Choose one of the following answers

- Cholecystectomy (preferably laparoscopic)
- ERCP, with sphincterotomy
- Non-invasive (UDCA treatment)
- All of above options are equally of use
- Other therapy option

## CASE 6

20 - 30 year old patient with repeating episodes of colic pain in the right upper abdominal quadrant, biochemically and on the abdominal US no other pathologies, ECOG 0.

| Klinische Chemie         |                        |        |   |             |         |
|--------------------------|------------------------|--------|---|-------------|---------|
| <input type="checkbox"/> | Natrium                | mmol/l | S | 135 - 145   | 141 139 |
| <input type="checkbox"/> | Kalium                 | mmol/l | S | 3,5 - 5,1   | 3,8 4,1 |
| <input type="checkbox"/> | Chlorid                | mmol/l | S | 98 - 107    |         |
| <input type="checkbox"/> | Glucose                | mg/dl  | S | 80 - 99     | 93      |
| <input type="checkbox"/> | Harnstoff              | mg/dl  | S | 17 - 49     | 26      |
| <input type="checkbox"/> | Kreatinin (Jaffé)      | mg/dl  | S | 0,5 - 1,0   | 0,8 0,7 |
| <input type="checkbox"/> | GFR (CKD-EPI)          | ml/min | S | >= 90       | 127 136 |
| <input type="checkbox"/> | Calcium                | mmol/l | S | 2,15 - 2,50 | 2,47    |
| <input type="checkbox"/> | Calcium (Alb.-korr.)   | mmol/l | S | 2,15 - 2,50 | 2,32    |
| <input type="checkbox"/> | Calcium (Eiw.-korr.)   | mmol/l | S | 2,15 - 2,50 | 2,48    |
| <input type="checkbox"/> | Magnesium              | mmol/l | S | 0,88 - 1,07 |         |
| <input type="checkbox"/> | Anorg. Phosphat        | mg/dl  | S | 2,5 - 4,8   |         |
| <input type="checkbox"/> | CRP                    | mg/dl  | S | <= 0,5      | 0,6 0,7 |
| <input type="checkbox"/> | Eiweiß, gesamt         | g/dl   | S | 6,4 - 8,4   | 7,7     |
| <input type="checkbox"/> | Albumin                | g/dl   | S | 3,5 - 5,2   | 4,6     |
| <input type="checkbox"/> | % Albumin              | %      | S | 55,8 - 68,1 |         |
| <input type="checkbox"/> | Bilirubin, gesamt      | mg/dl  | S | <= 1,2      | 0,4 0,3 |
| <input type="checkbox"/> | GOT [AST]              | U/l    | S | <= 34       | 21      |
| <input type="checkbox"/> | GPT [ALT]              | U/l    | S | <= 34       | 11      |
| <input type="checkbox"/> | Gamma-GT (37°)         | U/l    | S | <= 39       | 23 26   |
| <input type="checkbox"/> | Alkalische Phosphatase | U/l    | S | 35 - 105    | 84 91   |
| <input type="checkbox"/> | Alpha-Amylase          | U/l    | S | <= 109      |         |
| <input type="checkbox"/> | Lipase                 | U/l    | S | 13 - 60     | 23 23   |
| <input type="checkbox"/> | LDH (37°)              | U/l    | S | <= 249      | 142     |

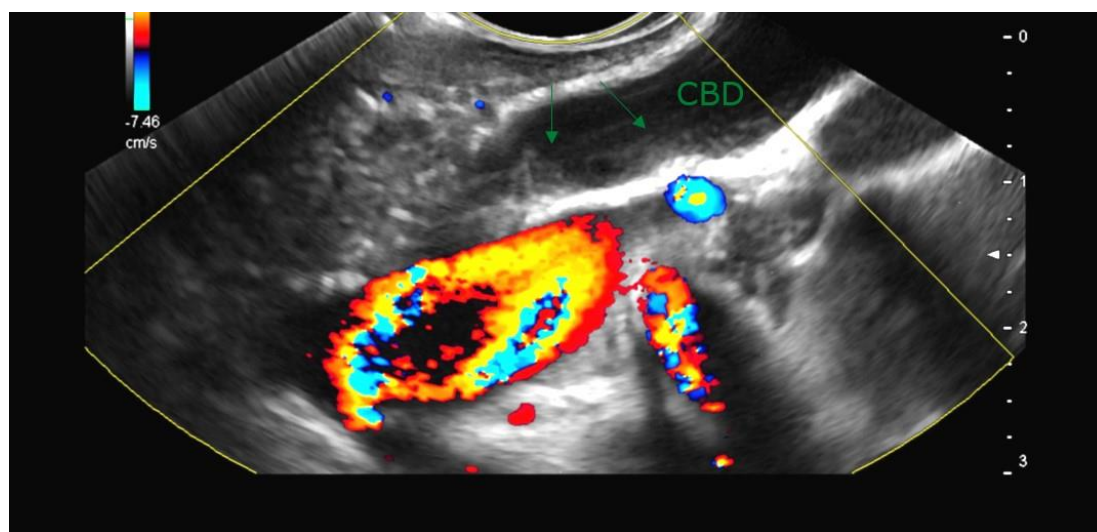

Picture 1 - Biochemical results. (all results and following images come from Klinikum LMU, Munich; Harnstoff - Urea, Harnsaure - Uric acid, Eiweiß gesamt - Total protein, Freies Kupfer - Free copper, Eisen - Iron)

Picture 2 - Linear endoscopic ultrasound. Focus on the common bile duct (CBD). Arrows are pointed at the area of interest.

**QUESTION 1:** How do you phrase the depicted finding in your report:

Choose one of the following answers

- Biliary Sludge
- Biliary Microlithiasis
- Biliary Sludge and Microlithiasis
- Gallstone(s)

**QUESTION 2:** What would be your FIRST CHOICE of treatment:

Choose one of the following answers

- Cholecystectomy (preferably laparoscopic)
- ERCP, with sphincterotomy
- Non-invasive (UDCA treatment)
- All of above options are equally of use
- Other therapy option

**CASE 7**

**40 – 50 year old patient with repeated right upper abdominal pain and history of cholestasis; biochemically and on the abdominal US no other pathologies reported, ECOG 0.**

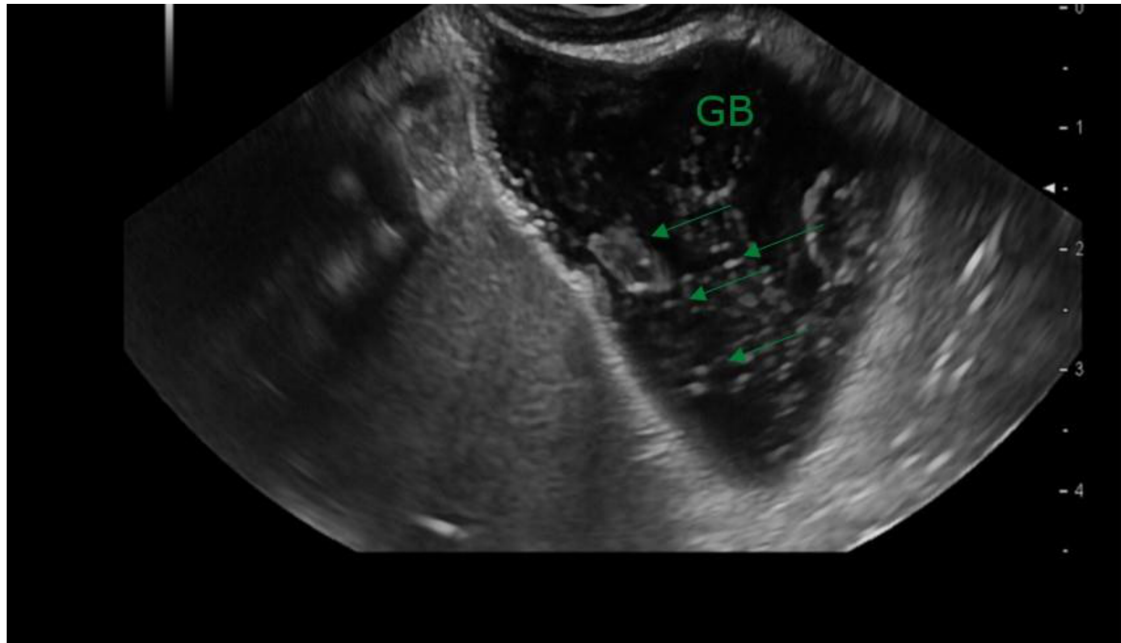

Picture 1 - Linear endoscopic ultrasound. Focus on the gallbladder (GB). Arrows are pointed at the area of interest.

**QUESTION 1:** How do you phrase the depicted finding in your report:

Choose one of the following answers

- Biliary Sludge
- Biliary Microlithiasis
- Biliary Sludge and Microlithiasis
- Gallstone(s)

**QUESTION 2:** What would be your FIRST CHOICE of treatment:

Choose one of the following answers

- Cholecystectomy (preferably laparoscopic)
- ERCP, with sphincterotomy
- Non-invasive (UDCA treatment)
- All of above options are equally of use
- Other therapy option

Next

[Impressum und Datenschutz](#)

## Definitions

Discrete, hyperechoic material inside the gallbladder or the bile duct, without acoustic shadowing, which sediment in the most dependent part of the gallbladder represents microlithiasis:

Choose one of the following answers

- Strongly agree
- Agree
- Neutral
- Disagree
- Strongly disagree

Discrete, hyperechoic material inside the gallbladder or the bile duct, without acoustic shadowing, which sediment in the most dependent part of the gallbladder represents biliary sludge:

Choose one of the following answers

- Strongly agree
- Agree
- Neutral
- Disagree
- Strongly disagree

The term „biliary sludge“ should be exclusively used if detected in gallbladder:

Choose one of the following answers

- Strongly agree
- Agree
- Neutral
- Disagree
- Strongly disagree

The term „biliary sludge“ should be used exclusively if detected in the bile duct:

Choose one of the following answers

- Strongly agree
- Agree
- Neutral
- Disagree
- Strongly disagree

The term „biliary sludge“ can be used both to diagnose findings in the bile duct as well as the gallbladder:

Choose one of the following answers

- Strongly agree
- Agree
- Neutral
- Disagree
- Strongly disagree

The term „biliary microlithiasis“ should be used exclusively for cases in which solid biliary and cholesterol crystals are detected after bile sample centrifugation and examination by phase-contrast and polarizing light microscopy:

Choose one of the following answers

- Strongly agree
- Agree
- Neutral
- Disagree
- Strongly disagree

The term „biliary microlithiasis“ should be used exclusively for cases in which EUS examination of the biliary tree reveals presence of stones less than (in diameter):

Choose one of the following answers

- < 10 mm
- < 5 mm
- < 3 mm
- Any stone visualized by EUS-examination but not causing obstruction of biliary duct

The terms „biliary sludge“ and „biliary microlithiasis“ describe an identical finding because both entities can cause clinically significant pain, cholangitis, and pancreatitis:

Choose one of the following answers

- Strongly agree
- Agree
- Neutral
- Disagree
- Strongly disagree

## Management

In your personal experience biliary sludge/microlithiasis is a cause of "idiopathic" pancreatitis in (percentage of cases):

Choose one of the following answers

- >75%
- 50-75%
- 10-50%
- <10%

In your personal experience the method of choice for confirming presence of biliary sludge/microlithiasis is:

Choose one of the following answers

- EUS
- MRI
- CT
- Transabdominal ultrasound
- ERCP
- ERCP + microscopic examination of the bile



What would be your FIRST CHOICE of treatment when microlithiasis/sludge is detected during IAP etiology assessment:

Choose one of the following answers

- Cholecystectomy (preferably laparoscopic)
- ERCP, with sphincterotomy
- Non-invasive (UDCA treatment)
- All of above options are equally of use

How often do you use ursodesoxycholic acid in patients with IAP and biliary sludge for prevention of sludge formation:

Choose one of the following answers

- Always
- Only in patients not qualified for surgical or endoscopic intervention
- Never

When EUS is not available, but elevated liver function tests are detected (e.g., ALAT levels >150 U/L within 48 h after onset of symptoms) and other criteria of idiopathic pancreatitis are met, the patient should be referred for cholecystectomy:

Choose one of the following answers

- Strongly agree
- Agree
- Neutral
- Disagree
- Strongly disagree

When EUS is not available, but elevated liver function tests are detected (e.g., ALAT levels >150 U/L within 48 h after onset of symptoms) and other criteria of idiopathic pancreatitis are met, the patient should be referred for ERCP with sphincterotomy:

Choose one of the following answers

- Strongly agree
- Agree
- Neutral
- Disagree
- Strongly disagree

When EUS is not available, but elevated liver function tests are detected (e.g., ALAT levels >150 U/L within 48 h after onset of symptoms) and other criteria of idiopathic pancreatitis are met, UDCA therapy should be prescribed:

Choose one of the following answers

- Strongly agree
- Agree
- Neutral
- Disagree
- Strongly disagree

## 8. Pancreatitis patient population stratified by underlying biliary entity

Of the initial 601 acute biliary pancreatitis patients retrospectively identified via ICD-10 code who were hospitalised at LMU University Hospital between 2005 and 2021, 101 patients were excluded from the final evaluation due to double recording, 82 patients due to incomplete data sets and 70 patients due to possible additive underlying pancreatitis etiologies (alcohol-induced, autoimmune pancreatitis, anatomical anomaly, idiopathic pancreatitis; Genetic pancreatitis susceptibilities were not found in the collective (as far as could be recorded retrospectively). Of 348 patients with biliary pancreatitis, 171 were excluded due to the occurrence of combined biliary concrementalities, so that 84 gallstone-induced pancreatitis patients, 43 microlithiasis-induced pancreatitis patients and 50 singular sludge-induced pancreatitis patients were finally evaluated. The statistical analysis was performed using the one-way ANOVA (baseline characteristics) and the Chi-Square test (clinical outcome) with an assumed statistical significance at  $p < 0.05$ .

|                                    | Sludge-AP<br>(n = 50) | Microlithiasis-AP<br>(n = 43) | Gallstone-AP<br>(n = 84) | p Value   |
|------------------------------------|-----------------------|-------------------------------|--------------------------|-----------|
| <b>Sex, N (%)</b>                  |                       |                               |                          |           |
| M                                  | 24 (48 %)             | 19 (44.18 %)                  | 39 (46.42 %)             |           |
| F                                  | 26 (52 %)             | 24 (55.81 %)                  | 45 (53.57 %)             |           |
| <b>Age, median (range)</b>         | 66 (26-96)            | 59 (21-96)                    | 69 (22-101)              | 0.0058**  |
| <b>BMI (kg/m<sup>2</sup>)</b>      | 26.49 ± 5.48          | 30.83 ± 7.98                  | 27.32 ± 6.36             | 0.0103*   |
| <b>Concrement localisation (%)</b> |                       |                               |                          |           |
| GB                                 | 54 %                  | 51.2 %                        | 54.7 %                   | 0.99 (ns) |
| CBD                                | 28 %                  | 30.2 %                        | 28.6 %                   |           |
| GB + CBD                           | 18 %                  | 18.6 %                        | 16.7 %                   |           |
| <b>CBD with in mm (mean ± SD)</b>  | 7.6 ± 3.2             | 8.7 ± 3.9                     | 9.7 ± 4.2                | 0.017*    |
| <b>Comorbidities, N(%)</b>         |                       |                               |                          |           |
| None                               | 17 (34 %)             | 13 (30.23 %)                  | 27 (32.14 %)             |           |
| Cholecystectomy                    | 3 (6 %)               | 4 (9.3 %)                     | 11 (13.09 %)             |           |
| Gastritis/Reflux                   | 3 (6 %)               | 6 (13.95%)                    | 6 (7.14 %)               |           |
| Liver disease                      | 4 (8 %)               | 2 (4.65 %)                    | 11 (13.09 %)             |           |
| Cardiac disease                    | 16 (32 %)             | 11 (25.58 %)                  | 24 (28.57 %)             |           |
| Carcinoma in history/current       | 6 (12 %)              | 4 (9.3 %)                     | 15 (17.85 %)             |           |
| Upper GI tract surgery             | 3 (6 %)               | 2 (4.65 %)                    | 2 (2.38 %)               |           |
| Dyslipidemia                       | 9 (18 %)              | 6 (13.95%)                    | 13 (15.47 %)             |           |
| Diabetes mellitus II               | 8 (16 %)              | 4 (9.3 %)                     | 10 (11.9 %)              |           |
| Arterial hypertension              | 27 (54 %)             | 19 (44.18 %)                  | 41 (48.8 %)              |           |
| <b>Medication on admission</b>     |                       |                               |                          |           |
| None                               | 19 (38 %)             | 15 (34.88 %)                  | 32 (39.09 %)             |           |
| PPI                                | 10 (20 %)             | 12 (27.9 %)                   | 20 (23.8 %)              |           |
| Antihypertensive drugs             | 24 (48 %)             | 19 (44.18 %)                  | 40 (47.61 %)             |           |
| Lipid lowering drugs               | 12 (24 %)             | 6 (13.95 %)                   | 16 (19.04 %)             |           |
| Diuretics                          | 5 (10 %)              | 7 (16.27 %)                   | 17 (20.23 %)             |           |
| Analgesics                         | 0 (0 %)               | 2 (4.65 %)                    | 0 (0 %)                  |           |
| Pancreatic enzymes                 | 0 (0 %)               | 0 (0 %)                       | 0 (0 %)                  |           |
| UDCA                               | 1 (2 %)               | 1 (2.32 %)                    | 1 (1.19 %)               |           |
| Immunosuppressant drugs            | 2 (4 %)               | 0 (0 %)                       | 6 (7.14 %)               |           |

**Supplement Table 2. Baseline characteristics**

## 9. Audience Agreement

| The term „biliary sludge“ can be used both to diagnose findings in the bile duct as well as the gallbladder |        |
|-------------------------------------------------------------------------------------------------------------|--------|
| Strongly agree                                                                                              | 34.5 % |
| Agree                                                                                                       | 55.2 % |
| Neutral                                                                                                     | 3.5 %  |
| Disagree                                                                                                    | 6.7 %  |

| Discrete, hyperechoic material inside the gallbladder or the bile duct, without acoustic shadowing, which sediments in the most dependent part of the gallbladder represents biliary sludge |        |
|---------------------------------------------------------------------------------------------------------------------------------------------------------------------------------------------|--------|
| Strongly agree                                                                                                                                                                              | 35.3 % |
| Agree                                                                                                                                                                                       | 35.3 % |
| Neutral                                                                                                                                                                                     | 23.5 % |
| Disagree                                                                                                                                                                                    | 5.99 % |

| The term „biliary microlithiasis“ should be used exclusively for cases in which EUS examination of the biliary tree reveals presence of stones > 3 and less than 5 mm (in diameter) with acoustic shadowing: |        |
|--------------------------------------------------------------------------------------------------------------------------------------------------------------------------------------------------------------|--------|
| Strongly agree                                                                                                                                                                                               | 47.9 % |
| Agree                                                                                                                                                                                                        | 17.4 % |
| Neutral                                                                                                                                                                                                      | 13.0 % |
| Disagree                                                                                                                                                                                                     | 17.4 % |
| Strongly disagree                                                                                                                                                                                            | 4.3 %  |

### Supplement Table 3.

Based on the survey expert consensus (biliary sludge) and survey expert consensus/internal review, the three statements were released for online plenary voting at the European Pancreatic Congress 2021 during the session on biliary pancreatitis. 89.7 % agreed that biliary sludge can be named as such in the gallbladder and common bile duct (n = 29). 70.6 % agreed that biliary sludge should be described sonomorphologically as discrete, hyperechoic material inside the gallbladder or the bile duct, without acoustic shadowing, which sediments in the most dependent part of the gallbladder represents biliary sludge (n = 17). 65.3% agreed with the definition that biliary microlithiasis is in a size range between 3 and 5 mm (n = 23).

## 10. Clinical Case Vignettes

In the clinical case vignette's part, the experts were asked to analyze transabdominal and endosonographic ultrasound images together with a short clinical case description and laboratory values. All cases included real-life scenarios selected among patients who presented themselves in the Emergency Department of LMU University Hospital in Munich-Grosshadern between 2018-2020. In case vignettes 1 and 3, terminology for concrements in the gallbladder and the common bile duct had to be selected, while in case vignettes 2, 4, 5, 6, and 7, terminology for concrements in the gallbladder or the common bile duct had to be given and a therapy recommendation had to be made. The following results were derived from the survey: 1) there is deep disagreement as to the definition of microlithiasis and biliary sludge among experts. 2) in case of microlithiasis with pain endoscopic retrograde cholangiopancreatography (ERCP) with sphincterotomy (SE) is more frequently recommended than cholecystectomy (76.9 % vs. 15.4 % and 88.5 % vs. 0.0 %, respectively  $p = 0.056$ ). In case of biliary sludge ERCP with sphincterotomy was recommended as the therapeutic approach of choice ( $p = 0.021$ ). If gallbladder stones were present ERCP with sphincterotomy received only 34.6 % of the votes and thus only slightly more than cholecystectomy with 26.9 %. Noninvasive UDCA therapy was also considered reasonable by 15.4 % of the experts in this case of a 23-year-old patient with a recurrent right upper abdominal colic. In case vignettes 4, the clear recommendation was for ERCP with sphincterotomy (84.6 %), whereas in case vignette 7, 88.5% favored cholecystectomy.

| Case Vignettes                                                                                                                                                             | Biochemical results                      | Expert Vote - Sonomorphology                  | Expert Vote - Treatment          |
|----------------------------------------------------------------------------------------------------------------------------------------------------------------------------|------------------------------------------|-----------------------------------------------|----------------------------------|
| <b>Case 1</b>                                                                                                                                                              |                                          | One answer choice allowed                     | First choice of treatment        |
| 33-year-old woman<br>severe abdominal pain, no<br>chronic diseases, no trauma, no<br>alcohol history                                                                       | CRP 0,7 mg/dl                            | Biliary Sludge (both GB and CBD):             | CHE: 15.4 %                      |
|                                                                                                                                                                            | Lipase > 7000 U/l                        | Biliary Microlithiasis (both GB and CBD):     | ERCP + EPT: 76.9 %               |
|                                                                                                                                                                            | Amylase 2056 U/l                         | Biliary Sludge (GB) and Microlithiasis (CBD): | UDCA: 0.0 %                      |
|                                                                                                                                                                            | ALT, AST, GGT, Bilirubin ↑               | Biliary Microlithiasis (GB) and Sludge (CBD): | All equal: 3.8 %                 |
|                                                                                                                                                                            |                                          | Gallstone(s) (both GB and CBD):               | Other: 0.0 %                     |
| <b>Case 2</b>                                                                                                                                                              |                                          | CBD                                           |                                  |
| 70-year-old woman, dilatation of<br>CBD in US (11 mm), no focal<br>lesions found on CT, no history<br>of biliary-type pain in the past,<br>no pancreatitis in the past     | CRP 2,3 mg/dl                            | Biliary Sludge:                               | CHE: 7.7 %                       |
|                                                                                                                                                                            | Lipase n.c.                              | Biliary Microlithiasis:                       | ERCP + EPT: 69.2 %               |
|                                                                                                                                                                            | Amylase n.c.                             | Biliary Sludge and Microlithiasis:            | UDCA: 11.5 %                     |
|                                                                                                                                                                            | ALT, AST, GGT, Bilirubin ↑               | Gallstone(s):                                 | All equal: 0.0 %<br>Other: 7.7 % |
| <b>Case 3</b>                                                                                                                                                              |                                          | GB + CBD                                      |                                  |
| 53-year-old man, relapsing<br>upper-right and upper-middle<br>quadrant abdominal pain,<br>sporadically vomiting, no history<br>of pancreatitis,                            | CRP 0.8 mg/dl                            | Biliary Sludge (both GB and CBD):             | CHE: 0.0 %                       |
|                                                                                                                                                                            | Lipase normal                            | Biliary Microlithiasis (both GB and CBD):     | ERCP + EPT: 88.5 %               |
|                                                                                                                                                                            | Amylase normal                           | Biliary Sludge (GB) and Microlithiasis (CBD): | UDCA: 0.0 %                      |
|                                                                                                                                                                            | ALT, AST, GGT, Bilirubin ↑               | Biliary Microlithiasis (GB) and Sludge (CBD): | All equal: 0.0 %                 |
|                                                                                                                                                                            |                                          | Gallstone(s) (both GB and CBD):               | Other: 3.8 %                     |
| <b>Case 4</b>                                                                                                                                                              |                                          | CBD                                           |                                  |
| 62-year-old male, with colic<br>upper right quadrant abdominal<br>pain                                                                                                     | CRP normal                               | Biliary Sludge:                               | CHE: 0.0 %                       |
|                                                                                                                                                                            | Lipase 282 U/l                           | Biliary Microlithiasis:                       | ERCP + EPT: 84.6 %               |
|                                                                                                                                                                            | Amylase n.c.                             | Biliary Sludge and Microlithiasis:            | UDCA: 3.8 %                      |
|                                                                                                                                                                            | ALT, AST, GGT ↑                          | Gallstone(s):                                 | All equal: 0.0 %                 |
|                                                                                                                                                                            | Bilirubin normal                         |                                               | Other: 3.8 %                     |
| <b>Case 5</b>                                                                                                                                                              |                                          | CBD                                           |                                  |
| 46-year-old patient, severe<br>abdominal pain, no trauma, no<br>history of alcohol abuse, no<br>history of chronic diseases                                                | CRP 1.5 mg/dl                            | Biliary Sludge:                               | CHE: 15.4 %                      |
|                                                                                                                                                                            | Lipase > 6000 U/l                        | Biliary Microlithiasis:                       | ERCP + EPT: 69.2 %               |
|                                                                                                                                                                            | Amylase n.c.                             | Biliary Sludge and Microlithiasis:            | UDCA: 3.8 %                      |
|                                                                                                                                                                            | ALT, AST, GGT                            | Gallstone(s):                                 | All equal: 3.8 %                 |
|                                                                                                                                                                            | Bilirubin ↓                              |                                               | Other: 0.0 %                     |
| <b>Case 6</b>                                                                                                                                                              |                                          | CBD                                           |                                  |
| 23-year-old patient with<br>repeating episodes of colic pain<br>in the right upper abdominal<br>quadrant, biochemically and on<br>the abdominal US no other<br>pathologies | CRP 0,7 mg/dl                            | Biliary Sludge:                               | CHE: 26.9 %                      |
|                                                                                                                                                                            | Lipase normal                            | Biliary Microlithiasis:                       | ERCP + EPT: 34.6 %               |
|                                                                                                                                                                            | Amylase n.c.                             | Biliary Sludge and Microlithiasis:            | UDCA: 15.4 %                     |
|                                                                                                                                                                            | ALT, AST, GGT                            | Gallstone(s):                                 | All equal: 3.8 %                 |
|                                                                                                                                                                            | and Bilirubin normal                     |                                               | Other: 11.5 %                    |
| <b>Case 7</b>                                                                                                                                                              |                                          | GB                                            |                                  |
| 44-year-old patient with<br>repeated right upper abdominal<br>pain and history of cholestasis                                                                              | Biochemically no<br>pathologies reported | Biliary Sludge:                               | CHE: 88.5 %                      |
|                                                                                                                                                                            |                                          | Biliary Microlithiasis:                       | ERCP + EPT: 3.8 %                |
|                                                                                                                                                                            |                                          | Biliary Sludge and Microlithiasis:            | UDCA: 0.0 %                      |
|                                                                                                                                                                            |                                          | Gallstone(s):                                 | All equal: 0.0 %                 |
|                                                                                                                                                                            |                                          |                                               | Other: 0.0 %                     |

**Supplement Table 4.** Case vignettes

On the basis of original case vignettes from the LMU hospital (Munich), the experts interviewed were to make definitional and therapeutic decisions on the basis of image-morphological and laboratory-chemical criteria. The laboratory values on presentation of the patients in the emergency room were presented, as well as an (endo)sonographic image with pre-marked concrements for more precise classification.
