# Supplementary material for: Consensus definition of sludge and microlithiasis as a possible cause of pancreatitis
Source: HighWire-hosted journal article supplement (doi:10.1136/gutjnl-2022-327955), 2023-04-18
Supplement: gutjnl-2022-327955supp002_data_supplement.pdf [file gutjnl-2022-327955supp002_data_supplement.pdf]

**LMU Microlithiasis Expert Team (to be indexed to the paper)**

1. **Marianna Arvanitakis**, *Erasmie Hospital, Université Libre de Bruxelles, Belgium*
2. **Marco Bruno**, *Erasmus University Medical Center, Rotterdam, the Netherlands*
3. **Djuna Cahen**, *Erasmus University Medical Center, Rotterdam, the Netherlands*
4. **Paul Fockens**, *Department of Gastroenterology and Hepatology, University of Amsterdam, the Netherlands*
5. **Martin Freeman**, *Department of Medicine, University of Minnesota Medical School, Minneapolis, USA*
6. **Pramod Garg**, *Department of Gastroenterology, All India Institute of Medical Sciences, New Delhi, India*
7. **Thomas Gress**, *Department of Gastroenterology, Philipps-Universität Marburg, Germany*
8. **Julio Iglesias-Garcia**, *University Hospital of Santiago de Compostela, Spain*
9. **Lukasz Krupa**, *Department of Gastroenterology and Hepatology, Teaching Hospital in Rzeszów, Poland*
10. **Anne Marie O'Broin Lennon**, *Johns Hopkins University School of Medicine, Baltimore, USA*
11. **Matthias Löhr**, *Department for Digestive Diseases, Karolinska University Hospital, Stockholm, Sweden*
12. **Enrique de Madaria**, *Department of Gastroenterology, Alicante University General Hospital, Spain*
13. **Colin McKay**, *University of Glasgow, Scotland, UK*
14. **Alexander Meining**, *Medical Department II, University Hospital Würzburg, Germany*
15. **Albrecht Neesse**, *Department of Gastroenterology, University Medical Center Goettingen, Germany*
16. **Hussein Okasha**, *Department of Internal Medicine, Division of Gastroenterology, Cairo University, Egypt*
17. **Kofi Oppong**, *Freeman Hospital, Newcastle upon Tyne, UK*
18. **Thierry Ponchon**, *Gastroenterology Department, Hôpital Edouard Herriot, Université de Lyon, France*
19. **Stephen Pereira**, *Institute for Liver and Digestive Health, University College London, UK*
20. **Vinciane Rebours**, *Service De Pancréatologie, Hôpital Beaujon, Clichy, France*
21. **Vikesh Singh**, *Pancreatitis Center, Johns Hopkins Medical Institutions, Baltimore, USA*
22. **Thomas Seufferlein**, *Department of Medicine I, University Hospital Ulm, Germany*
23. **Lyn A. Smith**, *University of Glasgow, Scotland, UK*
24. **Robert Staron**, *Department of Gastroenterology and Hepatology, Teaching Hospital in Rzeszów, Poland*
25. **C. Mel Wilcox**, *Division of Gastroenterology and Hepatology, University of Alabama at Birmingham, USA*

**Appendix (to be indexed to the paper):**

**Lucia Ballesteros**, *Biliopancreatic Unit. Gastroenterology Department. Hospital 12 de octubre, Madrid, Spain*  
**Emma Martínez**, *Fundació de Gastroenterologia Dr. Francisco Vilardell, Barcelona, Spain*  
**Cristina Nistri**, *UOC Terza Chirurgia Generale, Azienda ULSS2 Marca Trevigiana, Treviso, Italy*  
**Analia V. Pasqua**, *Hospital Italiano de Buenos Aires, Buenos Aires, Argentina*  
**Xavier Molero Richard**, *Servei d'Aparell Digestiu, Hospital Universitari Vall d'Hebron, Barcelona, Spain*  
**Lucas Ilzarbe Sanchez**, *Servicio de Aparato Digestivo, Hospital del Mar, IMAS, Barcelona, Spain*  
**Florian Scheufele**, *Department of Surgery, Klinikum rechts der Isar, Technical University of Munich, Germany*  
**Eva Christina Vaquero**, *ICMDM, Hospital Clínic de Barcelona, Barcelona, Spain*
